# Supplementary material for: Spatial and diurnal variations of aerosol organosulfates in summertime Shanghai, China: potential influence of photochemical processes and anthropogenic sulfate pollution
Source: Copernicus journal article supplement (doi:10.5194/acp-23-13433-2023), 2023-10-25
Supplement: Supplementary file 1 [file acp-23-13433-2023-supplement.pdf]

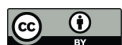

*Supplement of*

## **Spatial and diurnal variations of aerosol organosulfates in summertime Shanghai, China: potential influence of photochemical processes and anthropogenic sulfate pollution**

**Ting Yang et al.**

*Correspondence to:* Yu Xu ([xuyu360@sjtu.edu.cn](mailto:xuyu360@sjtu.edu.cn)), Yue Zhao ([yuezhao20@sjtu.edu.cn](mailto:yuezhao20@sjtu.edu.cn)),  
and Hua-Yun Xiao ([xiaohuayun@sjtu.edu.cn](mailto:xiaohuayun@sjtu.edu.cn))

The copyright of individual parts of the supplement might differ from the article licence.

## 16 S1. Classification of OSs

17 Mass spectrometry data was processed to obtain the  $m/z$  information, formula, and  
18 intensity of detected molecular ions using the MassLynx v4.1 software. A molecular  
19 formula calculator was used to predict the possible formula of identified compounds  
20 that can be expressed as  $C_nH_nO_nS_nN_n$  within the mass tolerance of  $\pm 10$  ppm.  
21 Specifically, a total of 212 organosulfates (OSs) were detected in  $PM_{2.5}$  samples. The  
22 quantified (or semi-quantified) OSs were distributed over a wide mass range ( $m/z$  167–  
23 691). The OSs and nitrooxy-organosulfates (NOSs) were initially identified from their  
24 molecular formulas based on the following equation (1) (Wang et al. 2019; Tao et al.  
25 2014).

$$26 \quad n_O / (4n_S + 3n_N) \geq 1 \quad (1)$$

27 where the  $n_O$ ,  $n_S$ , and  $n_N$  denote the number of oxygen, sulfur, and nitrogen atoms in a  
28 molecular formula, respectively.

29 The groups of isoprene-derived, monoterpene-derived, and  $C_2$ - $C_3$  OSs were  
30 further classified according to previous laboratory and filed studies (Hettiyadura et al.  
31 2019; Wang et al. 2021a). Specifically, the isoprene-derived OSs ( $OS_i$ ) were identified  
32 using the following method: (1) molecules with 4 and 5 carbon atoms were selected;  
33 (2) compounds with 4 carbon atoms have the characteristics of a double bond equivalent  
34 (DBE) value of 1–2,  $n_O \leq 6$ , and  $n_H \geq 6$ ; and (3) compounds with 5 carbon atoms have  
35 the characteristics of a DBE value of 0–2,  $n_O \leq 7$ , and  $n_H \geq 8$ . The detailed explanations  
36 about the workflow were provided by Xu et al. (2021). It should be noted that  $C_7H_9O_7S^-$   
37 was classified as  $OS_i$  based on Nozière et al. (2010). The DBE value was calculated via

38 the following equation (Yassine et al. 2014).

$$39 \quad \text{DBE} = 1 + n_C - n_H/2 + n_N/2 \quad (2)$$

40 where the  $n_C$ ,  $n_H$ , and  $n_N$  denote the number of carbon, hydrogen, and nitrogen atoms in  
41 a molecular formula, respectively.

42 For monoterpene-derived OSs ( $\text{OS}_m$ ), they were grouped according to the  
43 following criteria. The compounds have the characteristics of 10 carbon atoms,  
44 effective oxygen atoms ( $n_{\text{Oeff}} = n_{\text{O}} - 2n_{\text{N}}$ ) of more than 4, and  $2 \leq \text{DBE value} \leq 4$  (Guo  
45 et al. 2022; Ehn et al. 2012; Yan et al. 2016; Jokinen et al. 2014; Boyd et al. 2015;  
46 Berndt et al. 2016; Berndt et al. 2018). Moreover,  $\text{C}_7\text{H}_{11}\text{O}_6\text{S}^-$ ,  $\text{C}_7\text{H}_{11}\text{O}_7\text{S}^-$ ,  $\text{C}_8\text{H}_{13}\text{O}_7\text{S}^-$ ,  
47  $\text{C}_9\text{H}_{15}\text{O}_6\text{S}^-$ , and  $\text{C}_9\text{H}_{14}\text{NO}_8\text{S}^-$  were assigned to  $\text{OS}_m$  based on previous reports (Yassine  
48 et al. 2012; Nozière et al. 2010; Wang et al. 2017; Surratt et al. 2008). Moreover,  
49 correlation analysis between these target OSs and typical  $\text{OS}_m$  (e.g.,  $\text{C}_{10}\text{H}_{17}\text{O}_5\text{S}^-$ ) was  
50 performed, showing the significant correlations between them ( $r = 0.83\text{--}0.99$ ,  $P < 0.01$ ).  
51 This result further confirms the reliability of the above classification.

52 Previous studies have suggested that OSs with a DBE value  $\geq 2$  and aromaticity  
53 equivalent ( $X_C$ ) value  $\geq 2.5$  can be assigned to aromatic OSs (Jiang et al. 2022; Xie et  
54 al. 2021; Xie et al. 2020; Ma et al. 2022). The  $X_C$  value was calculated via the following  
55 equation (Yassine et al. 2014).

$$56 \quad X_C = [3(\text{DBE} - (f_m n_{\text{O}} - f_n n_{\text{S}})) - 2] / [\text{DBE} - (f_m n_{\text{O}} - f_n n_{\text{S}})] \quad (3)$$

57 where the  $n_{\text{O}}$  and  $n_{\text{S}}$  denote the number of oxygen and sulfur atoms in a molecular  
58 formula, respectively. The  $f_m$  and  $f_n$  refer to the fractions of oxygen and sulfur atoms  
59 involved in the  $\pi$ -bond structure of the compound, respectively (Yassine et al. 2014). In

60 this study, the negative ion mode was used in UPLC-ESI-QToF-MS analysis, which  
61 preferentially identified the compounds containing carboxylic acids and esters (Ye et al.  
62 2021). Thus, the calculation for  $X_C$  value of organosulfates can be simplified as the  
63 following equation (Ye et al. 2021).

$$64 \quad X_C = [3(\text{DBE} - 0.5(n_O - 4)) - 2] / [\text{DBE} - 0.5(n_O - 4)] \quad (4)$$

65 However, the products of monoterpene oxidation by  $\bullet\text{OH}$  or  $\text{NO}_3\bullet$  also include the  
66 compounds with a DBE value of 2 (Yan et al. 2016; Ehn et al. 2014; Trostl et al. 2016).  
67 This means that  $\text{OS}_m$  and aromatic OSs overlapped partly. Thus, aromatic OSs with a  
68 DBE value of 2 were further identified through correlation analysis between  
69 unidentified aromatic OSs and known  $\text{OS}_m$  and aromatic OSs (Bryant et al. 2021). The  
70 compounds were adopted with  $r$  value greater than 0.6 ( $P < 0.01$ ).

71 The OSs with a DBE value of less than 2, including alkanes and some unsaturated  
72 compounds, were assigned to aliphatic OSs (Xie et al. 2021; Xie et al. 2020; Tao et al.  
73 2014). Recently, some aliphatic oxygenated organic molecules were found to have a  
74 DBE value of 2 (Wang et al. 2021b). Thus, OSs with a DBE value of 2 were further  
75 identified through correlation analysis between unidentified aliphatic OSs and known  
76 aliphatic subgroups. The compounds were adopted with  $r$  value greater than 0.6 ( $P <$   
77 0.01). It should be noted that  $\text{C}_9\text{H}_{15}\text{O}_6\text{S}^-$  was divided into  $\text{OS}_m$  based on the  
78 abovementioned classification rules for  $\text{OS}_m$ , while  $\text{C}_9\text{H}_{15}\text{O}_7\text{S}^-$  was not classified as  
79  $\text{OS}_m$ . This is because  $\text{C}_9\text{H}_{15}\text{O}_7\text{S}^-$  showed a stronger correlation with typical  
80 anthropogenic OS (e.g.,  $\text{C}_8\text{H}_{17}\text{O}_4\text{S}^-$ ;  $r = 0.98$ ,  $P < 0.01$ ) than typical  $\text{OS}_m$  ( $r < 0.98$ ). In  
81 this study, aliphatic and aromatic OSs were referred to anthropogenic OSs ( $\text{OS}_a$ ).

82 Several reported OS<sub>a</sub> (non aromatic or aliphatic compounds) were classified as other  
83 anthropogenic OS (OS<sub>a</sub>-other) (Wang et al. 2021a; Berndt et al. 2016).  
84

85 **Table S1.** Organosulfate quantification using UPLC-ESI(-)-QToFMS.

| Formula<br>[M-H] <sup>-</sup>                                               | MW (Da)  | Standard<br>for quantification | Reference                 | <i>r</i> <sup>2</sup> |
|-----------------------------------------------------------------------------|----------|--------------------------------|---------------------------|-----------------------|
| <b>Isoprene-derived OSs</b>                                                 |          |                                |                           |                       |
| C <sub>4</sub> H <sub>7</sub> O <sub>5</sub> S <sup>-</sup>                 | 167.0014 | Lactic acid sulfate<br>(LAS)   | (Schindelka et al. 2013)  |                       |
| C <sub>4</sub> H <sub>7</sub> O <sub>6</sub> S <sup>-</sup>                 | 182.9963 | LAS                            | (Shalamzari 2013)         |                       |
| C <sub>5</sub> H <sub>9</sub> O <sub>6</sub> S <sup>-</sup>                 | 197.0120 | LAS                            | (Riva et al. 2016a)       |                       |
| C <sub>4</sub> H <sub>7</sub> O <sub>7</sub> S <sup>-</sup>                 | 198.9912 | LAS                            | (Hettiyadura et al. 2015) |                       |
| C <sub>5</sub> H <sub>11</sub> O <sub>6</sub> S <sup>-</sup>                | 199.0276 | LAS                            | (Riva et al. 2016a)       |                       |
| C <sub>5</sub> H <sub>7</sub> O <sub>7</sub> S <sup>-</sup>                 | 210.9912 | LAS                            | (Hettiyadura et al. 2015) |                       |
| C <sub>5</sub> H <sub>9</sub> O <sub>7</sub> S <sup>-</sup>                 | 213.0069 | LAS                            | (Riva et al. 2016a)       |                       |
| C <sub>5</sub> H <sub>11</sub> O <sub>7</sub> S <sup>-</sup>                | 215.0225 | LAS                            | (Surratt et al. 2010)     |                       |
| C <sub>7</sub> H <sub>9</sub> O <sub>7</sub> S <sup>-</sup>                 | 237.0069 | LAS                            | (Nozière et al. 2010)     |                       |
| C <sub>5</sub> H <sub>10</sub> NO <sub>9</sub> S <sup>-</sup>               | 260.0076 | LAS                            | (Surratt et al. 2007)     |                       |
| C <sub>5</sub> H <sub>8</sub> NO <sub>10</sub> S <sup>-</sup>               | 273.9869 | LAS                            | (Nestorowicz et al. 2018) |                       |
| C <sub>5</sub> H <sub>7</sub> O <sub>8</sub> S <sup>-</sup>                 | 226.9862 | LAS                            |                           | 0.90                  |
| C <sub>5</sub> H <sub>9</sub> O <sub>8</sub> S <sup>-</sup>                 | 229.0018 | LAS                            |                           | 0.94                  |
| C <sub>4</sub> H <sub>7</sub> O <sub>8</sub> S <sup>-</sup>                 | 214.9862 | LAS                            |                           | 0.72                  |
| C <sub>4</sub> H <sub>5</sub> O <sub>7</sub> S <sup>-</sup>                 | 196.9756 | LAS                            |                           | 0.67                  |
| C <sub>4</sub> H <sub>6</sub> NO <sub>9</sub> S <sup>-</sup>                | 243.9763 | LAS                            |                           | 0.87                  |
| C <sub>4</sub> H <sub>8</sub> NO <sub>7</sub> S <sup>-</sup>                | 214.0021 | LAS                            |                           | 0.94                  |
| C <sub>5</sub> H <sub>8</sub> NO <sub>7</sub> S <sup>-</sup>                | 226.0021 | LAS                            |                           | 0.90                  |
| C <sub>5</sub> H <sub>9</sub> N <sub>2</sub> O <sub>11</sub> S <sup>-</sup> | 260.0076 | LAS                            |                           | 0.75                  |
| <b>Monoterpene-derived OSs</b>                                              |          |                                |                           |                       |
| C <sub>7</sub> H <sub>11</sub> O <sub>6</sub> S <sup>-</sup>                | 223.0276 | Glycolic acid sulfate<br>(GAS) | (Yassine et al. 2012)     |                       |
| C <sub>7</sub> H <sub>11</sub> O <sub>7</sub> S <sup>-</sup>                | 239.0225 | GAS                            | (Nozière et al. 2010)     |                       |
| C <sub>10</sub> H <sub>17</sub> O <sub>5</sub> S <sup>-</sup>               | 249.0797 | α-Pinene sulfate               | (Wang et al. 2017)        |                       |
| C <sub>8</sub> H <sub>13</sub> O <sub>7</sub> S <sup>-</sup>                | 253.0382 | GAS                            | (Schindelka et al. 2013)  |                       |
| C <sub>10</sub> H <sub>15</sub> O <sub>7</sub> S <sup>-</sup>               | 279.0538 | GAS                            | (Surratt et al. 2007)     |                       |
| C <sub>10</sub> H <sub>17</sub> O <sub>7</sub> S <sup>-</sup>               | 281.0695 | α-Pinene sulfate               | (Nozière et al. 2010)     |                       |
| C <sub>10</sub> H <sub>16</sub> NO <sub>7</sub> S <sup>-</sup>              | 294.0647 | α-Pinene sulfate               | (Surratt et al. 2008)     |                       |
| C <sub>9</sub> H <sub>14</sub> NO <sub>8</sub> S <sup>-</sup>               | 296.0440 | Limonaketone sulfate           | (Surratt et al. 2008)     |                       |
| C <sub>10</sub> H <sub>16</sub> NO <sub>10</sub> S <sup>-</sup>             | 342.0495 | Limonaketone sulfate           | (Yassine et al. 2012)     |                       |
| C <sub>9</sub> H <sub>15</sub> O <sub>6</sub> S <sup>-</sup>                | 251.0589 | Limonaketone sulfate           | (Wang et al. 2017)        |                       |
| C <sub>10</sub> H <sub>15</sub> O <sub>5</sub> S <sup>-</sup>               | 247.0640 | α-Pinene sulfate               |                           | 0.81                  |
| C <sub>10</sub> H <sub>15</sub> O <sub>6</sub> S <sup>-</sup>               | 263.0589 | α-Pinene sulfate               |                           | 0.87                  |
| C <sub>10</sub> H <sub>17</sub> O <sub>6</sub> S <sup>-</sup>               | 265.0746 | α-Pinene sulfate               |                           | 0.94                  |

|                                        |          |                            |                           |      |
|----------------------------------------|----------|----------------------------|---------------------------|------|
| $C_{10}H_{17}O_8S^-$                   | 297.0644 | $\alpha$ -Pinene sulfate   |                           | 0.96 |
| $C_{10}H_{15}O_7S^-$                   | 279.0538 | $\alpha$ -Pinene sulfate   |                           | 0.97 |
| $C_{10}H_{15}O_8S^-$                   | 295.0488 | $\alpha$ -Pinene sulfate   |                           | 0.98 |
| $C_{10}H_{17}NO_9S^-$                  | 326.0546 | $\alpha$ -Pinene sulfate   |                           | 0.85 |
| <b>C<sub>2</sub>-C<sub>3</sub> OSs</b> |          |                            |                           |      |
| $C_3H_5O_4S^-$                         | 136.9909 | GAS                        | (Yassine et al. 2012)     |      |
| $C_2H_3O_5S^-$                         | 138.9701 | GAS                        | (Yassine et al. 2012)     |      |
| $C_3H_5O_5S^-$                         | 152.9858 | GAS                        | (Hettiyadura et al. 2015) |      |
| $C_2H_3O_6S^-$                         | 154.9650 | GAS                        | (Olson et al. 2011)       |      |
| $C_3H_7O_5S^-$                         | 155.0014 | GAS                        | (Hettiyadura et al. 2019) |      |
| $C_3H_5O_6S^-$                         | 168.9807 | LAS                        | (Olson et al. 2011)       |      |
| <b>Aliphatic-OSs</b>                   |          |                            |                           |      |
| $C_8H_{17}O_4S^-$                      | 210.0926 | Sodium octyl Sulfate (SOS) | (Wang et al. 2021a)       |      |
| $C_{12}H_{21}O_7S^-$                   | 309.1008 | SOS                        |                           | 0.94 |
| $C_{14}H_{29}O_5S^-$                   | 309.1736 | SOS                        |                           | 0.79 |
| $C_{16}H_{33}O_5S^-$                   | 337.2049 | SOS                        |                           | 0.93 |
| $C_6H_{13}O_4S^-$                      | 181.0535 | SOS                        |                           | 0.98 |
| $C_7H_{15}O_4S^-$                      | 195.0691 | SOS                        |                           | 0.91 |
| $C_7H_{15}O_5S^-$                      | 211.064  | SOS                        |                           | 0.89 |
| $C_9H_{19}O_4S^-$                      | 223.1004 | SOS                        |                           | 0.70 |
| $C_{10}H_{21}O_4S^-$                   | 237.1161 | SOS                        |                           | 0.7  |
| $C_{24}H_{51}N_2O_{13}S^-$             | 607.3112 | SOS                        |                           | 0.79 |
| $C_7H_{13}O_5S^-$                      | 209.0484 | SOS                        |                           | 0.86 |
| $C_9H_{17}O_5S^-$                      | 237.0797 | SOS                        |                           | 0.89 |
| $C_{10}H_{19}O_5S^-$                   | 251.0953 | SOS                        |                           | 0.70 |
| $C_9H_{17}O_7S^-$                      | 269.0695 | SOS                        |                           | 0.72 |
| $C_{12}H_{23}O_5S^-$                   | 279.1266 | SOS                        |                           | 0.90 |
| $C_9H_{17}O_4S^-$                      | 221.0848 | SOS                        |                           | 0.68 |
| $C_{10}H_{19}O_5S^-$                   | 251.0953 | SOS                        |                           | 0.72 |
| $C_9H_{17}O_6S^-$                      | 253.0746 | SOS                        |                           | 0.90 |
| $C_{11}H_{21}O_5S^-$                   | 265.1110 | SOS                        |                           | 0.68 |
| $C_{10}H_{19}O_6S^-$                   | 267.0902 | SOS                        |                           | 0.73 |
| $C_{13}H_{25}O_5S^-$                   | 293.1423 | SOS                        |                           | 0.84 |
| $C_{14}H_{27}O_5S^-$                   | 307.1579 | SOS                        |                           | 0.94 |
| $C_{13}H_{25}O_6S^-$                   | 309.1372 | SOS                        |                           | 0.72 |
| $C_{14}H_{27}O_6S^-$                   | 323.1528 | SOS                        |                           | 0.75 |
| $C_{16}H_{31}O_5S^-$                   | 335.1892 | SOS                        |                           | 0.96 |
| $C_{17}H_{33}O_5S^-$                   | 349.2049 | SOS                        |                           | 0.94 |
| $C_{16}H_{31}O_6S^-$                   | 351.1841 | SOS                        |                           | 0.7  |
| $C_{18}H_{35}O_5S^-$                   | 363.2205 | SOS                        |                           | 0.76 |

|                                                                |          |     |      |
|----------------------------------------------------------------|----------|-----|------|
| C <sub>21</sub> H <sub>41</sub> O <sub>5</sub> S <sup>-</sup>  | 405.2675 | SOS | 0.94 |
| C <sub>8</sub> H <sub>15</sub> O <sub>5</sub> S <sup>-</sup>   | 223.0640 | SOS | 0.69 |
| C <sub>7</sub> H <sub>13</sub> O <sub>6</sub> S <sup>-</sup>   | 225.0433 | SOS | 0.76 |
| C <sub>6</sub> H <sub>11</sub> O <sub>7</sub> S <sup>-</sup>   | 227.0225 | SOS | 0.94 |
| C <sub>8</sub> H <sub>15</sub> O <sub>6</sub> S <sup>-</sup>   | 239.0589 | SOS | 0.89 |
| C <sub>6</sub> H <sub>11</sub> O <sub>8</sub> S <sup>-</sup>   | 243.0175 | SOS | 0.87 |
| C <sub>11</sub> H <sub>21</sub> O <sub>5</sub> S <sup>-</sup>  | 265.1110 | SOS | 0.69 |
| C <sub>10</sub> H <sub>19</sub> O <sub>6</sub> S <sup>-</sup>  | 267.0902 | SOS | 0.88 |
| C <sub>7</sub> H <sub>13</sub> O <sub>9</sub> S <sup>-</sup>   | 273.0280 | SOS | 0.70 |
| C <sub>15</sub> H <sub>29</sub> O <sub>5</sub> S <sup>-</sup>  | 321.1736 | SOS | 0.88 |
| C <sub>26</sub> H <sub>51</sub> O <sub>12</sub> S <sup>-</sup> | 587.3101 | SOS | 0.95 |
| C <sub>10</sub> H <sub>17</sub> O <sub>6</sub> S <sup>-</sup>  | 265.0746 | SOS | 0.85 |
| C <sub>9</sub> H <sub>15</sub> O <sub>5</sub> S <sup>-</sup>   | 235.0640 | SOS | 0.95 |
| C <sub>10</sub> H <sub>17</sub> O <sub>5</sub> S <sup>-</sup>  | 249.0797 | SOS | 0.93 |
| C <sub>9</sub> H <sub>15</sub> O <sub>6</sub> S <sup>-</sup>   | 251.0589 | SOS | 0.91 |
| C <sub>10</sub> H <sub>17</sub> O <sub>6</sub> S <sup>-</sup>  | 265.0746 | SOS | 0.72 |
| C <sub>9</sub> H <sub>15</sub> O <sub>5</sub> S <sup>-</sup>   | 235.0640 | SOS | 0.98 |
| C <sub>10</sub> H <sub>17</sub> O <sub>5</sub> S <sup>-</sup>  | 249.0797 | SOS | 0.94 |
| C <sub>9</sub> H <sub>15</sub> O <sub>6</sub> S <sup>-</sup>   | 251.0589 | SOS | 0.92 |
| C <sub>10</sub> H <sub>17</sub> O <sub>6</sub> S <sup>-</sup>  | 265.0746 | SOS | 0.69 |
| C <sub>11</sub> H <sub>19</sub> O <sub>6</sub> S <sup>-</sup>  | 279.0902 | SOS | 0.78 |
| C <sub>12</sub> H <sub>21</sub> O <sub>6</sub> S <sup>-</sup>  | 293.1059 | SOS | 0.72 |
| C <sub>14</sub> H <sub>25</sub> O <sub>6</sub> S <sup>-</sup>  | 321.1372 | SOS | 0.63 |
| C <sub>8</sub> H <sub>13</sub> O <sub>6</sub> S <sup>-</sup>   | 237.0433 | SOS | 0.75 |
| C <sub>9</sub> H <sub>15</sub> O <sub>7</sub> S <sup>-</sup>   | 267.0538 | SOS | 0.73 |

#### Aromatic-OSs

|                                                                |          |                |                     |      |
|----------------------------------------------------------------|----------|----------------|---------------------|------|
| C <sub>6</sub> H <sub>5</sub> O <sub>4</sub> S <sup>-</sup>    | 172.9909 | Phenyl sulfate | (Wang et al. 2021a) |      |
| C <sub>7</sub> H <sub>7</sub> SO <sub>4</sub> S <sup>-</sup>   | 218.9786 | Phenyl sulfate | (Wang et al. 2021a) |      |
| C <sub>11</sub> H <sub>19</sub> O <sub>11</sub> S <sup>-</sup> | 359.0648 | Phenyl sulfate |                     | 0.77 |
| C <sub>10</sub> H <sub>17</sub> O <sub>12</sub> S <sup>-</sup> | 361.0441 | Phenyl sulfate |                     | 0.64 |
| C <sub>7</sub> H <sub>11</sub> O <sub>9</sub> S <sup>-</sup>   | 271.0124 | Phenyl sulfate |                     | 0.65 |
| C <sub>7</sub> H <sub>11</sub> O <sub>10</sub> S <sup>-</sup>  | 287.0073 | Phenyl sulfate |                     | 0.69 |
| C <sub>8</sub> H <sub>13</sub> O <sub>9</sub> S <sup>-</sup>   | 285.0280 | Phenyl sulfate |                     | 0.70 |
| C <sub>8</sub> H <sub>13</sub> O <sub>10</sub> S <sup>-</sup>  | 301.0229 | Phenyl sulfate |                     | 0.81 |
| C <sub>11</sub> H <sub>17</sub> O <sub>11</sub> S <sup>-</sup> | 357.0492 | Phenyl sulfate |                     | 0.86 |
| C <sub>8</sub> H <sub>12</sub> NO <sub>11</sub> S <sup>-</sup> | 330.0131 | Phenyl sulfate |                     | 0.90 |
| C <sub>8</sub> H <sub>7</sub> O <sub>5</sub> S <sup>-</sup>    | 215.0014 | Phenyl sulfate |                     | 0.91 |
| C <sub>8</sub> H <sub>7</sub> NO <sub>5</sub> S <sup>-</sup>   | 229.0045 | Phenyl sulfate |                     | 0.89 |
| C <sub>8</sub> H <sub>7</sub> O <sub>4</sub> S <sup>-</sup>    | 199.0065 | Phenyl sulfate |                     | 0.98 |
| C <sub>9</sub> H <sub>7</sub> O <sub>7</sub> S <sup>-</sup>    | 258.9912 | Phenyl sulfate |                     | 0.89 |
| C <sub>9</sub> H <sub>7</sub> O <sub>6</sub> S <sup>-</sup>    | 242.9963 | Phenyl sulfate |                     | 0.74 |



|                                                                  |          |                |                      |
|------------------------------------------------------------------|----------|----------------|----------------------|
| C <sub>34</sub> H <sub>49</sub> O <sub>5</sub> S <sup>-</sup>    | 569.3301 | Phenyl sulfate | 0.64                 |
| C <sub>43</sub> H <sub>63</sub> O <sub>5</sub> S <sup>-</sup>    | 691.4396 | Phenyl sulfate | 0.72                 |
| C <sub>7</sub> H <sub>11</sub> O <sub>9</sub> S <sup>-</sup>     | 271.0124 | Phenyl sulfate | 0.74                 |
| C <sub>10</sub> H <sub>7</sub> O <sub>11</sub> S <sup>-</sup>    | 334.9709 | Phenyl sulfate | 0.86                 |
| C <sub>10</sub> H <sub>5</sub> O <sub>11</sub> S <sup>-</sup>    | 332.9553 | Phenyl sulfate | 0.77                 |
| C <sub>10</sub> H <sub>5</sub> O <sub>10</sub> S <sup>-</sup>    | 316.9603 | Phenyl sulfate | 0.72                 |
| C <sub>12</sub> H <sub>7</sub> O <sub>13</sub> S <sup>-</sup>    | 390.9607 | Phenyl sulfate | 0.65                 |
| C <sub>8</sub> H <sub>7</sub> O <sub>5</sub> S <sup>-</sup>      | 215.0014 | Phenyl sulfate | 0.77                 |
| C <sub>7</sub> H <sub>5</sub> SO <sub>5</sub> S <sup>-</sup>     | 200.9858 | Phenyl sulfate | 0.65                 |
| C <sub>9</sub> H <sub>9</sub> O <sub>4</sub> S <sup>-</sup>      | 213.0222 | Phenyl sulfate | 0.72                 |
| C <sub>7</sub> H <sub>6</sub> SO <sub>4</sub> S <sup>-</sup>     | 185.9987 | Phenyl sulfate | 0.73                 |
| C <sub>18</sub> H <sub>13</sub> O <sub>6</sub> S <sup>-</sup>    | 357.0433 | Phenyl sulfate | 0.69                 |
| C <sub>23</sub> H <sub>19</sub> O <sub>7</sub> S <sup>-</sup>    | 439.0851 | Phenyl sulfate | 0.65                 |
| C <sub>25</sub> H <sub>21</sub> O <sub>7</sub> S <sup>-</sup>    | 465.1008 | Phenyl sulfate | 0.77                 |
| C <sub>24</sub> H <sub>17</sub> O <sub>4</sub> S <sup>-</sup>    | 401.0848 | Phenyl sulfate | 0.73                 |
| C <sub>27</sub> H <sub>21</sub> O <sub>7</sub> S <sup>-</sup>    | 489.1008 | Phenyl sulfate | 0.90                 |
| C <sub>12</sub> H <sub>21</sub> N <sub>2</sub> O <sub>11</sub> S | 401.0866 | Phenyl sulfate | 0.77                 |
| <b>OS<sub>a</sub>-other</b>                                      |          |                |                      |
| C <sub>4</sub> H <sub>7</sub> O <sub>4</sub> S <sup>-</sup>      | 151.0065 | Methyl sulfate | (Wang et al. 2021a)  |
| C <sub>5</sub> H <sub>7</sub> O <sub>6</sub> S <sup>-</sup>      | 194.9963 | GAS            | (Wang et al. 2021a)  |
| C <sub>6</sub> H <sub>9</sub> O <sub>6</sub> S <sup>-</sup>      | 209.0120 | GAS            | (Berndt et al. 2016) |

86 <sup>a</sup>Unreported OSs were further identified through correlation analysis between unreported OSs and known  
87 OSs. Aliphatic and aromatic OSs were referred to anthropogenic OSs (OS<sub>a</sub>). The compounds were  
88 adopted with *r* value greater than 0.6 (*P* < 0.01). Details were shown in **Sect. S1** (Classification of OSs).

89

90

91

92

93

94

95

96

97

98 **Table S2.** The mean mass concentrations ( $\pm$  SD) of identified OS<sub>i</sub>, OS<sub>m</sub>, and C<sub>2</sub>-C<sub>3</sub> OSs  
 99 in PM<sub>2.5</sub> collected in urban and suburban Shanghai in daytime and nighttime.

| Formula [M <sup>-</sup> H] <sup>-</sup>                                     | MW (Da)  | Urban (ng m <sup>-3</sup> ) |               | Suburban (ng m <sup>-3</sup> ) |               |
|-----------------------------------------------------------------------------|----------|-----------------------------|---------------|--------------------------------|---------------|
|                                                                             |          | Daytime                     | Nighttime     | Daytime                        | Nighttime     |
| <b>Isoprene-derived OSs</b>                                                 |          |                             |               |                                |               |
| C <sub>4</sub> H <sub>7</sub> O <sub>5</sub> S <sup>-</sup>                 | 167.0014 | 0.70 ± 0.75                 | 0.49 ± 0.55   | 0.53 ± 0.44                    | 0.34 ± 0.17   |
| C <sub>4</sub> H <sub>7</sub> O <sub>6</sub> S <sup>-</sup>                 | 182.9963 | 5.93 ± 6.30                 | 1.94 ± 2.83   | 3.80 ± 4.18                    | 0.96 ± 1.13   |
| C <sub>5</sub> H <sub>9</sub> O <sub>6</sub> S <sup>-</sup>                 | 197.0120 | 4.36 ± 5.49                 | 1.93 ± 2.95   | 2.20 ± 2.51                    | 1.26 ± 1.52   |
| C <sub>4</sub> H <sub>7</sub> O <sub>7</sub> S <sup>-</sup>                 | 198.9912 | 6.09 ± 7.93                 | 2.20 ± 3.56   | 3.20 ± 4.19                    | 1.30 ± 1.76   |
| C <sub>5</sub> H <sub>11</sub> O <sub>6</sub> S <sup>-</sup>                | 199.0276 | 1.60 ± 2.46                 | 0.66 ± 0.96   | 0.77 ± 0.94                    | 0.39 ± 0.41   |
| C <sub>5</sub> H <sub>7</sub> O <sub>7</sub> S <sup>-</sup>                 | 210.9912 | 11.99 ± 16.15               | 4.88 ± 6.49   | 6.38 ± 7.97                    | 3.67 ± 4.46   |
| C <sub>5</sub> H <sub>9</sub> O <sub>7</sub> S <sup>-</sup>                 | 213.0069 | 12.32 ± 12.2                | 6.91 ± 4.83   | 9.47 ± 4.36                    | 6.61 ± 2.05   |
| C <sub>5</sub> H <sub>11</sub> O <sub>7</sub> S <sup>-</sup>                | 215.0225 | 53.44 ± 72.16               | 22.74 ± 36.10 | 25.64 ± 28.99                  | 13.91 ± 14.14 |
| C <sub>7</sub> H <sub>9</sub> O <sub>7</sub> S <sup>-</sup>                 | 237.0069 | 0.81 ± 1.01                 | 0.44 ± 0.85   | 0.46 ± 0.51                    | 0.29 ± 0.44   |
| C <sub>5</sub> H <sub>7</sub> O <sub>8</sub> S <sup>-</sup>                 | 226.9862 | 9.89 ± 10.69                | 4.58 ± 5.60   | 6.22 ± 6.87                    | 2.13 ± 3.01   |
| C <sub>5</sub> H <sub>9</sub> O <sub>8</sub> S <sup>-</sup>                 | 229.0018 | 4.47 ± 5.96                 | 2.29 ± 3.67   | 2.09 ± 2.64                    | 0.98 ± 1.37   |
| C <sub>4</sub> H <sub>7</sub> O <sub>8</sub> S <sup>-</sup>                 | 214.9862 | 0.52 ± 0.46                 | 0.40 ± 0.44   | 0.53 ± 0.54                    | 0.26 ± 0.29   |
| C <sub>4</sub> H <sub>5</sub> O <sub>7</sub> S <sup>-</sup>                 | 196.9756 | 0.48 ± 0.31                 | 0.34 ± 0.27   | 0.44 ± 0.31                    | 0.33 ± 0.19   |
| C <sub>4</sub> H <sub>6</sub> NO <sub>9</sub> S <sup>-</sup>                | 243.9763 | 0.18 ± 0.19                 | 0.13 ± 0.07   | 0.13 ± 0.01                    | 0.11 ± 0.01   |
| C <sub>4</sub> H <sub>8</sub> NO <sub>7</sub> S <sup>-</sup>                | 214.0021 | 0.38 ± 0.47                 | 0.23 ± 0.24   | 0.25 ± 0.17                    | 0.18 ± 0.11   |
| C <sub>5</sub> H <sub>8</sub> NO <sub>7</sub> S <sup>-</sup>                | 226.0021 | 0.49 ± 0.83                 | 0.17 ± 0.20   | 0.28 ± 0.28                    | 0.15 ± 0.09   |
| C <sub>5</sub> H <sub>10</sub> NO <sub>9</sub> S <sup>-</sup>               | 260.0076 | 1.79 ± 3.03                 | 0.95 ± 2.06   | 0.49 ± 0.86                    | 0.37 ± 0.71   |
| C <sub>5</sub> H <sub>8</sub> NO <sub>10</sub> S <sup>-</sup>               | 273.9869 | 1.14 ± 2.09                 | 0.73 ± 1.47   | 0.41 ± 0.44                    | 0.23 ± 0.35   |
| C <sub>5</sub> H <sub>9</sub> N <sub>2</sub> O <sub>11</sub> S <sup>-</sup> | 260.0076 | 1.02 ± 1.96                 | 3.06 ± 6.16   | 0.37 ± 0.42                    | 0.82 ± 1.60   |
| <b>Monoterpene-derived OSs</b>                                              |          |                             |               |                                |               |
| C <sub>7</sub> H <sub>11</sub> O <sub>6</sub> S <sup>-</sup>                | 223.0276 | 8.24 ± 12.05                | 3.07 ± 4.24   | 4.13 ± 5.16                    | 1.82 ± 1.72   |
| C <sub>7</sub> H <sub>11</sub> O <sub>7</sub> S <sup>-</sup>                | 239.0225 | 11.04 ± 17.59               | 3.29 ± 5.02   | 4.40 ± 5.84                    | 1.69 ± 1.61   |
| C <sub>10</sub> H <sub>17</sub> O <sub>5</sub> S <sup>-</sup>               | 249.0797 | 0.20 ± 0.20                 | 0.11 ± 0.05   | 0.16 ± 0.05                    | 0.10 ± 0.05   |
| C <sub>9</sub> H <sub>15</sub> O <sub>6</sub> S <sup>-</sup>                | 251.0589 | 0.47 ± 0.47                 | 0.31 ± 0.21   | 0.30 ± 0.16                    | 0.22 ± 0.09   |
| C <sub>8</sub> H <sub>13</sub> O <sub>7</sub> S <sup>-</sup>                | 253.0382 | 10.33 ± 16.91               | 3.18 ± 4.92   | 4.35 ± 5.81                    | 8.71 ± 25.31  |
| C <sub>10</sub> H <sub>15</sub> O <sub>7</sub> S <sup>-</sup>               | 279.0538 | 8.24 ± 12.34                | 4.94 ± 6.61   | 4.68 ± 4.50                    | 2.88 ± 2.64   |
| C <sub>10</sub> H <sub>17</sub> O <sub>7</sub> S <sup>-</sup>               | 281.0695 | 0.14 ± 0.09                 | 0.10 ± 0.03   | 0.14 ± 0.03                    | 0.10 ± 0.01   |
| C <sub>10</sub> H <sub>15</sub> O <sub>5</sub> S <sup>-</sup>               | 247.0640 | 0.07 ± 0.02                 | 0.08 ± 0.03   | 0.08 ± 0.01                    | 0.07 ± 0.01   |
| C <sub>10</sub> H <sub>15</sub> O <sub>6</sub> S <sup>-</sup>               | 263.0589 | 0.04 ± 0.05                 | 0.04 ± 0.04   | 0.03 ± 0.04                    | 0.05 ± 0.03   |
| C <sub>10</sub> H <sub>17</sub> O <sub>6</sub> S <sup>-</sup>               | 265.0746 | 0.08 ± 0.03                 | 0.06 ± 0.01   | 0.07 ± 0.02                    | 0.06 ± 0.01   |
| C <sub>10</sub> H <sub>17</sub> O <sub>8</sub> S <sup>-</sup>               | 297.0644 | 0.13 ± 0.05                 | 0.10 ± 0.02   | 0.13 ± 0.02                    | 0.11 ± 0.01   |
| C <sub>10</sub> H <sub>15</sub> O <sub>7</sub> S <sup>-</sup>               | 279.0538 | 0.19 ± 0.14                 | 0.13 ± 0.06   | 0.16 ± 0.04                    | 0.12 ± 0.02   |
| C <sub>10</sub> H <sub>15</sub> O <sub>8</sub> S <sup>-</sup>               | 295.0488 | 0.13 ± 0.06                 | 0.10 ± 0.02   | 0.14 ± 0.01                    | 0.11 ± 0.01   |
| C <sub>10</sub> H <sub>17</sub> NO <sub>9</sub> S <sup>-</sup>              | 326.0546 | 0.16 ± 0.07                 | 0.13 ± 0.07   | 0.16 ± 0.03                    | 0.12 ± 0.03   |
| C <sub>10</sub> H <sub>16</sub> NO <sub>7</sub> S <sup>-</sup>              | 294.0647 | 0.34 ± 0.3                  | 1.98 ± 1.89   | 0.24 ± 0.14                    | 0.87 ± 0.58   |
| C <sub>9</sub> H <sub>14</sub> NO <sub>8</sub> S <sup>-</sup>               | 296.0440 | 0.12 ± 0.11                 | 0.39 ± 0.23   | 0.12 ± 0.11                    | 0.26 ± 0.07   |
| C <sub>10</sub> H <sub>16</sub> NO <sub>10</sub> S <sup>-</sup>             | 342.0495 | 0.22 ± 0.20                 | 0.41 ± 0.41   | 0.17 ± 0.14                    | 0.26 ± 0.13   |
| <b>C<sub>2</sub>-C<sub>3</sub> OSs</b>                                      |          |                             |               |                                |               |
| C <sub>3</sub> H <sub>5</sub> O <sub>4</sub> S <sup>-</sup>                 | 136.9909 | 1.36 ± 0.94                 | 0.98 ± 0.59   | 1.17 ± 0.48                    | 0.95 ± 0.37   |
| C <sub>2</sub> H <sub>3</sub> O <sub>5</sub> S <sup>-</sup>                 | 138.9701 | 1.73 ± 1.13                 | 1.69 ± 1.25   | 1.70 ± 0.64                    | 1.60 ± 1.17   |
| C <sub>3</sub> H <sub>5</sub> O <sub>5</sub> S <sup>-</sup>                 | 152.9858 | 9.33 ± 10.64                | 4.51 ± 4.51   | 5.91 ± 5.50                    | 3.18 ± 2.54   |
| C <sub>2</sub> H <sub>3</sub> O <sub>6</sub> S <sup>-</sup>                 | 154.9650 | 9.69 ± 8.65                 | 4.55 ± 4.55   | 6.89 ± 6.07                    | 4.07 ± 3.58   |
| C <sub>3</sub> H <sub>7</sub> O <sub>5</sub> S <sup>-</sup>                 | 155.0014 | 1.44 ± 1.07                 | 1.69 ± 1.42   | 1.76 ± 1.28                    | 1.37 ± 0.93   |
| C <sub>3</sub> H <sub>5</sub> O <sub>6</sub> S <sup>-</sup>                 | 168.9807 | 3.19 ± 2.61                 | 2.18 ± 3.08   | 2.64 ± 1.94                    | 1.60 ± 0.88   |

100  
 101  
 102  
 103  
 104  
 105  
 106

107 **Table S3.** The mean mass concentrations ( $\pm$  SD) of identified anthropogenic OSs in  
 108 PM<sub>2.5</sub> collected in urban and suburban Shanghai in daytime and nighttime.

| Formula [MH] <sup>-</sup>                                                     | MW (Da)  | Urban (ng m <sup>-3</sup> ) |                 | Suburban (ng m <sup>-3</sup> ) |                 |
|-------------------------------------------------------------------------------|----------|-----------------------------|-----------------|--------------------------------|-----------------|
|                                                                               |          | Daytime                     | Nighttime       | Daytime                        | Nighttime       |
| <b>Aliphatic-OSs<sup>a</sup></b>                                              |          |                             |                 |                                |                 |
| C <sub>12</sub> H <sub>21</sub> O <sub>7</sub> S <sup>-</sup>                 | 309.1008 | 0.13 $\pm$ 0.09             | 0.10 $\pm$ 0.05 | 0.12 $\pm$ 0.03                | 0.10 $\pm$ 0.02 |
| C <sub>8</sub> H <sub>17</sub> O <sub>4</sub> S <sup>-</sup>                  | 210.0926 | 0.12 $\pm$ 0.03             | 0.13 $\pm$ 0.05 | 0.10 $\pm$ 0.02                | 0.08 $\pm$ 0.01 |
| C <sub>14</sub> H <sub>29</sub> O <sub>5</sub> S <sup>-</sup>                 | 309.1736 | 0.07 $\pm$ 0.01             | 0.06 $\pm$ 0.01 | 0.08 $\pm$ 0.01                | 0.07 $\pm$ 0.01 |
| C <sub>16</sub> H <sub>33</sub> O <sub>5</sub> S <sup>-</sup>                 | 337.2049 | 0.06 $\pm$ 0.01             | 0.05 $\pm$ 0.01 | 0.07 $\pm$ 0.01                | 0.06 $\pm$ 0.01 |
| C <sub>6</sub> H <sub>13</sub> O <sub>4</sub> S <sup>-</sup>                  | 181.0535 | 0.05 $\pm$ 0.01             | 0.05 $\pm$ 0.01 | 0.07 $\pm$ 0.01                | 0.05 $\pm$ 0.01 |
| C <sub>7</sub> H <sub>15</sub> O <sub>4</sub> S <sup>-</sup>                  | 195.0691 | 0.06 $\pm$ 0.01             | 0.06 $\pm$ 0.01 | 0.07 $\pm$ 0.01                | 0.06 $\pm$ 0.01 |
| C <sub>7</sub> H <sub>15</sub> O <sub>5</sub> S <sup>-</sup>                  | 211.064  | 0.06 $\pm$ 0.01             | 0.05 $\pm$ 0.01 | 0.07 $\pm$ 0.01                | 0.06 $\pm$ 0.01 |
| C <sub>9</sub> H <sub>19</sub> O <sub>4</sub> S <sup>-</sup>                  | 223.1004 | 0.07 $\pm$ 0.01             | 0.06 $\pm$ 0.01 | 0.08 $\pm$ 0.01                | 0.07 $\pm$ 0.01 |
| C <sub>10</sub> H <sub>21</sub> O <sub>4</sub> S <sup>-</sup>                 | 237.1161 | 0.08 $\pm$ 0.01             | 0.08 $\pm$ 0.02 | 0.10 $\pm$ 0.01                | 0.09 $\pm$ 0.01 |
| C <sub>24</sub> H <sub>51</sub> N <sub>2</sub> O <sub>13</sub> S <sup>-</sup> | 607.3112 | 0.06 $\pm$ 0.01             | 0.05 $\pm$ 0.01 | 0.07 $\pm$ 0.01                | 0.05 $\pm$ 0.01 |
| C <sub>7</sub> H <sub>13</sub> O <sub>5</sub> S <sup>-</sup>                  | 209.0484 | 0.08 $\pm$ 0.03             | 0.06 $\pm$ 0.02 | 0.08 $\pm$ 0.02                | 0.06 $\pm$ 0.01 |
| C <sub>9</sub> H <sub>17</sub> O <sub>5</sub> S <sup>-</sup>                  | 237.0797 | 0.14 $\pm$ 0.08             | 0.08 $\pm$ 0.03 | 0.11 $\pm$ 0.05                | 0.07 $\pm$ 0.02 |
| C <sub>10</sub> H <sub>19</sub> O <sub>5</sub> S <sup>-</sup>                 | 251.0953 | 0.15 $\pm$ 0.25             | 0.06 $\pm$ 0.02 | 0.08 $\pm$ 0.02                | 0.06 $\pm$ 0.01 |
| C <sub>9</sub> H <sub>17</sub> O <sub>7</sub> S <sup>-</sup>                  | 269.0695 | 0.07 $\pm$ 0.03             | 0.05 $\pm$ 0.01 | 0.07 $\pm$ 0.01                | 0.06 $\pm$ 0.01 |
| C <sub>12</sub> H <sub>23</sub> O <sub>5</sub> S <sup>-</sup>                 | 279.1266 | 0.28 $\pm$ 0.24             | 0.18 $\pm$ 0.14 | 0.16 $\pm$ 0.10                | 0.09 $\pm$ 0.04 |
| C <sub>9</sub> H <sub>17</sub> O <sub>4</sub> S <sup>-</sup>                  | 221.0848 | 0.09 $\pm$ 0.02             | 0.07 $\pm$ 0.01 | 0.10 $\pm$ 0.02                | 0.07 $\pm$ 0.01 |
| C <sub>10</sub> H <sub>19</sub> O <sub>5</sub> S <sup>-</sup>                 | 251.0953 | 0.15 $\pm$ 0.25             | 0.06 $\pm$ 0.02 | 0.08 $\pm$ 0.02                | 0.06 $\pm$ 0.01 |
| C <sub>9</sub> H <sub>17</sub> O <sub>6</sub> S <sup>-</sup>                  | 253.0746 | 0.08 $\pm$ 0.04             | 0.06 $\pm$ 0.02 | 0.08 $\pm$ 0.01                | 0.06 $\pm$ 0.01 |
| C <sub>11</sub> H <sub>21</sub> O <sub>5</sub> S <sup>-</sup>                 | 265.1110 | 0.17 $\pm$ 0.13             | 0.13 $\pm$ 0.08 | 0.14 $\pm$ 0.08                | 0.09 $\pm$ 0.03 |
| C <sub>10</sub> H <sub>19</sub> O <sub>6</sub> S <sup>-</sup>                 | 267.0902 | 0.07 $\pm$ 0.02             | 0.05 $\pm$ 0.01 | 0.07 $\pm$ 0.01                | 0.06 $\pm$ 0.01 |
| C <sub>13</sub> H <sub>25</sub> O <sub>5</sub> S <sup>-</sup>                 | 293.1423 | 0.31 $\pm$ 0.27             | 0.20 $\pm$ 0.16 | 0.16 $\pm$ 0.08                | 0.11 $\pm$ 0.04 |
| C <sub>14</sub> H <sub>27</sub> O <sub>5</sub> S <sup>-</sup>                 | 307.1579 | 0.25 $\pm$ 0.25             | 0.13 $\pm$ 0.09 | 0.11 $\pm$ 0.05                | 0.08 $\pm$ 0.02 |
| C <sub>13</sub> H <sub>25</sub> O <sub>6</sub> S <sup>-</sup>                 | 309.1372 | 0.06 $\pm$ 0.01             | 0.05 $\pm$ 0.01 | 0.07 $\pm$ 0.01                | 0.06 $\pm$ 0.01 |
| C <sub>14</sub> H <sub>27</sub> O <sub>6</sub> S <sup>-</sup>                 | 323.1528 | 0.06 $\pm$ 0.01             | 0.05 $\pm$ 0.01 | 0.07 $\pm$ 0.01                | 0.06 $\pm$ 0.01 |
| C <sub>16</sub> H <sub>31</sub> O <sub>5</sub> S <sup>-</sup>                 | 335.1892 | 0.05 $\pm$ 0.01             | 0.05 $\pm$ 0.01 | 0.07 $\pm$ 0.01                | 0.06 $\pm$ 0.01 |
| C <sub>17</sub> H <sub>33</sub> O <sub>5</sub> S <sup>-</sup>                 | 349.2049 | 0.07 $\pm$ 0.01             | 0.08 $\pm$ 0.02 | 0.11 $\pm$ 0.03                | 0.13 $\pm$ 0.05 |
| C <sub>16</sub> H <sub>31</sub> O <sub>6</sub> S <sup>-</sup>                 | 351.1841 | 0.08 $\pm$ 0.03             | 0.06 $\pm$ 0.01 | 0.08 $\pm$ 0.01                | 0.06 $\pm$ 0.01 |
| C <sub>18</sub> H <sub>35</sub> O <sub>5</sub> S <sup>-</sup>                 | 363.2205 | 0.05 $\pm$ 0.01             | 0.05 $\pm$ 0.01 | 0.07 $\pm$ 0.01                | 0.05 $\pm$ 0.01 |
| C <sub>21</sub> H <sub>41</sub> O <sub>5</sub> S <sup>-</sup>                 | 405.2675 | 0.06 $\pm$ 0.01             | 0.05 $\pm$ 0.01 | 0.08 $\pm$ 0.01                | 0.06 $\pm$ 0.01 |
| C <sub>8</sub> H <sub>15</sub> O <sub>5</sub> S <sup>-</sup>                  | 223.0640 | 0.08 $\pm$ 0.02             | 0.06 $\pm$ 0.02 | 0.08 $\pm$ 0.01                | 0.06 $\pm$ 0.01 |
| C <sub>7</sub> H <sub>13</sub> O <sub>6</sub> S <sup>-</sup>                  | 225.0433 | 0.06 $\pm$ 0.02             | 0.05 $\pm$ 0.01 | 0.07 $\pm$ 0.01                | 0.06 $\pm$ 0.01 |
| C <sub>6</sub> H <sub>11</sub> O <sub>7</sub> S <sup>-</sup>                  | 227.0225 | 0.07 $\pm$ 0.04             | 0.05 $\pm$ 0.01 | 0.07 $\pm$ 0.01                | 0.05 $\pm$ 0.01 |
| C <sub>8</sub> H <sub>15</sub> O <sub>6</sub> S <sup>-</sup>                  | 239.0589 | 0.08 $\pm$ 0.03             | 0.06 $\pm$ 0.01 | 0.08 $\pm$ 0.01                | 0.06 $\pm$ 0.01 |
| C <sub>6</sub> H <sub>11</sub> O <sub>8</sub> S <sup>-</sup>                  | 243.0175 | 0.05 $\pm$ 0.01             | 0.05 $\pm$ 0.01 | 0.07 $\pm$ 0.01                | 0.05 $\pm$ 0.01 |
| C <sub>11</sub> H <sub>21</sub> O <sub>5</sub> S <sup>-</sup>                 | 265.1110 | 0.11 $\pm$ 0.05             | 0.09 $\pm$ 0.03 | 0.11 $\pm$ 0.02                | 0.09 $\pm$ 0.02 |
| C <sub>10</sub> H <sub>19</sub> O <sub>6</sub> S <sup>-</sup>                 | 267.0902 | 0.06 $\pm$ 0.01             | 0.05 $\pm$ 0.01 | 0.07 $\pm$ 0.01                | 0.05 $\pm$ 0.01 |
| C <sub>7</sub> H <sub>13</sub> O <sub>9</sub> S <sup>-</sup>                  | 273.0280 | 0.05 $\pm$ 0.01             | 0.05 $\pm$ 0.01 | 0.07 $\pm$ 0.01                | 0.05 $\pm$ 0.01 |
| C <sub>15</sub> H <sub>29</sub> O <sub>5</sub> S <sup>-</sup>                 | 321.1736 | 0.15 $\pm$ 0.16             | 0.07 $\pm$ 0.04 | 0.08 $\pm$ 0.02                | 0.06 $\pm$ 0.01 |
| C <sub>26</sub> H <sub>51</sub> O <sub>12</sub> S <sup>-</sup>                | 587.3101 | 0.08 $\pm$ 0.02             | 0.05 $\pm$ 0.01 | 0.07 $\pm$ 0.01                | 0.06 $\pm$ 0.01 |
| C <sub>10</sub> H <sub>17</sub> O <sub>6</sub> S <sup>-</sup>                 | 265.0746 | 0.07 $\pm$ 0.02             | 0.05 $\pm$ 0.01 | 0.07 $\pm$ 0.01                | 0.06 $\pm$ 0.01 |
| C <sub>9</sub> H <sub>15</sub> O <sub>5</sub> S <sup>-</sup>                  | 235.0640 | 0.10 $\pm$ 0.04             | 0.06 $\pm$ 0.02 | 0.09 $\pm$ 0.02                | 0.06 $\pm$ 0.01 |
| C <sub>10</sub> H <sub>17</sub> O <sub>5</sub> S <sup>-</sup>                 | 249.0797 | 0.07 $\pm$ 0.02             | 0.06 $\pm$ 0.01 | 0.08 $\pm$ 0.01                | 0.06 $\pm$ 0.01 |
| C <sub>9</sub> H <sub>15</sub> O <sub>6</sub> S <sup>-</sup>                  | 251.0589 | 0.08 $\pm$ 0.05             | 0.06 $\pm$ 0.02 | 0.08 $\pm$ 0.02                | 0.06 $\pm$ 0.01 |
| C <sub>10</sub> H <sub>17</sub> O <sub>6</sub> S <sup>-</sup>                 | 265.0746 | 0.07 $\pm$ 0.02             | 0.05 $\pm$ 0.01 | 0.07 $\pm$ 0.01                | 0.06 $\pm$ 0.01 |
| C <sub>11</sub> H <sub>19</sub> O <sub>6</sub> S <sup>-</sup>                 | 279.0902 | 0.07 $\pm$ 0.02             | 0.05 $\pm$ 0.01 | 0.07 $\pm$ 0.01                | 0.06 $\pm$ 0.01 |
| C <sub>12</sub> H <sub>21</sub> O <sub>6</sub> S <sup>-</sup>                 | 293.1059 | 0.06 $\pm$ 0.01             | 0.05 $\pm$ 0.01 | 0.07 $\pm$ 0.01                | 0.05 $\pm$ 0.01 |
| C <sub>14</sub> H <sub>25</sub> O <sub>6</sub> S <sup>-</sup>                 | 321.1372 | 0.18 $\pm$ 0.19             | 0.08 $\pm$ 0.04 | 0.09 $\pm$ 0.02                | 0.07 $\pm$ 0.01 |
| C <sub>8</sub> H <sub>13</sub> O <sub>6</sub> S <sup>-</sup>                  | 237.0433 | 0.08 $\pm$ 0.03             | 0.06 $\pm$ 0.02 | 0.09 $\pm$ 0.02                | 0.07 $\pm$ 0.02 |
| C <sub>9</sub> H <sub>15</sub> O <sub>7</sub> S <sup>-</sup>                  | 267.0538 | 0.13 $\pm$ 0.14             | 0.06 $\pm$ 0.04 | 0.08 $\pm$ 0.02                | 0.06 $\pm$ 0.01 |

| <b>Aromatic-OSs</b>                                                           |          |             |             |             |             |
|-------------------------------------------------------------------------------|----------|-------------|-------------|-------------|-------------|
| C <sub>11</sub> H <sub>19</sub> O <sub>11</sub> S <sup>-</sup>                | 359.0648 | 0.14 ± 0.01 | 0.12 ± 0.01 | 0.18 ± 0.01 | 0.15 ± 0.01 |
| C <sub>10</sub> H <sub>17</sub> O <sub>12</sub> S <sup>-</sup>                | 361.0441 | 0.15 ± 0.02 | 0.12 ± 0.01 | 0.18 ± 0.01 | 0.15 ± 0.01 |
| C <sub>7</sub> H <sub>11</sub> O <sub>9</sub> S <sup>-</sup>                  | 271.0124 | 0.16 ± 0.04 | 0.13 ± 0.02 | 0.19 ± 0.02 | 0.15 ± 0.01 |
| C <sub>7</sub> H <sub>11</sub> O <sub>10</sub> S <sup>-</sup>                 | 287.0073 | 0.22 ± 0.10 | 0.15 ± 0.04 | 0.23 ± 0.06 | 0.17 ± 0.03 |
| C <sub>8</sub> H <sub>13</sub> O <sub>9</sub> S <sup>-</sup>                  | 285.0280 | 0.15 ± 0.01 | 0.12 ± 0.01 | 0.18 ± 0.02 | 0.15 ± 0.01 |
| C <sub>8</sub> H <sub>13</sub> O <sub>10</sub> S <sup>-</sup>                 | 301.0229 | 0.15 ± 0.02 | 0.12 ± 0.01 | 0.18 ± 0.01 | 0.15 ± 0.01 |
| C <sub>11</sub> H <sub>17</sub> O <sub>11</sub> S <sup>-</sup>                | 357.0492 | 0.14 ± 0.01 | 0.12 ± 0.01 | 0.18 ± 0.01 | 0.15 ± 0.01 |
| C <sub>8</sub> H <sub>12</sub> NO <sub>11</sub> S <sup>-</sup>                | 330.0131 | 0.15 ± 0.02 | 0.13 ± 0.02 | 0.19 ± 0.02 | 0.15 ± 0.01 |
| C <sub>7</sub> H <sub>7</sub> SO <sub>4</sub> S <sup>-</sup>                  | 218.9786 | 0.15 ± 0.01 | 0.13 ± 0.02 | 0.18 ± 0.01 | 0.15 ± 0.01 |
| C <sub>8</sub> H <sub>7</sub> O <sub>5</sub> S <sup>-</sup>                   | 215.0014 | 0.18 ± 0.05 | 0.15 ± 0.05 | 0.20 ± 0.03 | 0.16 ± 0.02 |
| C <sub>8</sub> H <sub>7</sub> NO <sub>5</sub> S <sup>-</sup>                  | 229.0045 | 0.14 ± 0.01 | 0.12 ± 0.01 | 0.17 ± 0.01 | 0.14 ± 0.01 |
| C <sub>8</sub> H <sub>7</sub> O <sub>4</sub> S <sup>-</sup>                   | 199.0065 | 0.15 ± 0.02 | 0.12 ± 0.01 | 0.18 ± 0.01 | 0.15 ± 0.01 |
| C <sub>9</sub> H <sub>7</sub> O <sub>7</sub> S <sup>-</sup>                   | 258.9912 | 0.14 ± 0.01 | 0.12 ± 0.01 | 0.18 ± 0.01 | 0.14 ± 0.01 |
| C <sub>9</sub> H <sub>7</sub> O <sub>6</sub> S <sup>-</sup>                   | 242.9963 | 0.14 ± 0.01 | 0.12 ± 0.01 | 0.18 ± 0.01 | 0.14 ± 0.01 |
| C <sub>34</sub> H <sub>49</sub> O <sub>5</sub> S <sup>-</sup>                 | 569.3301 | 1.34 ± 0.51 | 0.59 ± 0.35 | 0.26 ± 0.11 | 0.18 ± 0.02 |
| C <sub>43</sub> H <sub>63</sub> O <sub>5</sub> S <sup>-</sup>                 | 691.4396 | 0.27 ± 0.07 | 0.18 ± 0.06 | 0.19 ± 0.01 | 0.16 ± 0.01 |
| C <sub>7</sub> H <sub>11</sub> O <sub>9</sub> S <sup>-</sup>                  | 271.0124 | 0.24 ± 0.14 | 0.16 ± 0.08 | 0.22 ± 0.06 | 0.17 ± 0.04 |
| C <sub>10</sub> H <sub>7</sub> O <sub>11</sub> S <sup>-</sup>                 | 334.9709 | 0.20 ± 0.09 | 0.15 ± 0.07 | 0.20 ± 0.05 | 0.16 ± 0.03 |
| C <sub>10</sub> H <sub>5</sub> O <sub>11</sub> S <sup>-</sup>                 | 332.9553 | 0.15 ± 0.01 | 0.12 ± 0.01 | 0.18 ± 0.01 | 0.15 ± 0.01 |
| C <sub>10</sub> H <sub>5</sub> O <sub>10</sub> S <sup>-</sup>                 | 316.9603 | 0.15 ± 0.02 | 0.12 ± 0.01 | 0.18 ± 0.01 | 0.15 ± 0.01 |
| C <sub>12</sub> H <sub>7</sub> O <sub>13</sub> S <sup>-</sup>                 | 390.9607 | 0.14 ± 0.01 | 0.12 ± 0.01 | 0.18 ± 0.01 | 0.14 ± 0.01 |
| C <sub>8</sub> H <sub>7</sub> O <sub>5</sub> S <sup>-</sup>                   | 215.0014 | 0.20 ± 0.07 | 0.17 ± 0.06 | 0.22 ± 0.04 | 0.18 ± 0.03 |
| C <sub>7</sub> H <sub>5</sub> SO <sub>5</sub> S <sup>-</sup>                  | 200.9858 | 0.20 ± 0.07 | 0.15 ± 0.05 | 0.21 ± 0.04 | 0.17 ± 0.03 |
| C <sub>9</sub> H <sub>9</sub> O <sub>4</sub> S <sup>-</sup>                   | 213.0222 | 0.21 ± 0.08 | 0.16 ± 0.05 | 0.25 ± 0.06 | 0.17 ± 0.03 |
| C <sub>7</sub> H <sub>6</sub> SO <sub>4</sub> S <sup>-</sup>                  | 185.9987 | 0.16 ± 0.02 | 0.13 ± 0.01 | 0.18 ± 0.01 | 0.15 ± 0.01 |
| C <sub>18</sub> H <sub>13</sub> O <sub>6</sub> S <sup>-</sup>                 | 357.0433 | 0.14 ± 0.01 | 0.12 ± 0.01 | 0.18 ± 0.01 | 0.15 ± 0.01 |
| C <sub>23</sub> H <sub>19</sub> O <sub>7</sub> S <sup>-</sup>                 | 439.0851 | 0.19 ± 0.04 | 0.13 ± 0.01 | 0.21 ± 0.02 | 0.17 ± 0.01 |
| C <sub>25</sub> H <sub>21</sub> O <sub>7</sub> S <sup>-</sup>                 | 465.1008 | 0.14 ± 0.01 | 0.13 ± 0.03 | 0.17 ± 0.01 | 0.15 ± 0.01 |
| C <sub>24</sub> H <sub>17</sub> O <sub>4</sub> S <sup>-</sup>                 | 401.0848 | 0.19 ± 0.03 | 0.15 ± 0.02 | 0.23 ± 0.03 | 0.18 ± 0.01 |
| C <sub>27</sub> H <sub>21</sub> O <sub>7</sub> S <sup>-</sup>                 | 489.1008 | 0.14 ± 0.01 | 0.12 ± 0.01 | 0.17 ± 0.01 | 0.14 ± 0.01 |
| C <sub>6</sub> H <sub>5</sub> O <sub>4</sub> S <sup>-</sup>                   | 172.9909 | 0.15 ± 0.01 | 0.12 ± 0.01 | 0.18 ± 0.01 | 0.14 ± 0.01 |
| C <sub>7</sub> H <sub>7</sub> O <sub>4</sub> S <sup>-</sup>                   | 187.0065 | 0.15 ± 0.01 | 0.13 ± 0.02 | 0.18 ± 0.01 | 0.15 ± 0.01 |
| C <sub>12</sub> H <sub>21</sub> N <sub>2</sub> O <sub>11</sub> S <sup>-</sup> | 401.0866 | 0.19 ± 0.03 | 0.15 ± 0.02 | 0.23 ± 0.03 | 0.18 ± 0.01 |
| <b>OS<sub>a</sub>-other</b>                                                   |          |             |             |             |             |
| C <sub>4</sub> H <sub>7</sub> O <sub>4</sub> S <sup>-</sup>                   | 151.0065 | 0.93 ± 0.77 | 0.83 ± 1.17 | 0.55 ± 0.43 | 0.44 ± 0.50 |
| C <sub>5</sub> H <sub>7</sub> O <sub>6</sub> S <sup>-</sup>                   | 194.9963 | 3.68 ± 3.75 | 1.80 ± 1.66 | 2.29 ± 1.80 | 1.35 ± 0.72 |
| C <sub>6</sub> H <sub>9</sub> O <sub>6</sub> S <sup>-</sup>                   | 209.0120 | 4.44 ± 6.52 | 3.00 ± 3.69 | 2.52 ± 3.24 | 1.90 ± 1.80 |

109 <sup>a</sup>Aliphatic and aromatic OSs were grouped into anthropogenic OSs (OS<sub>a</sub>) (Riva et al. 2016b; Riva et al.  
110 2015). Several unidentified aromatic and aliphatic OSs were classified as other anthropogenic OSs (OS<sub>a</sub>-  
111 other).  
112

**Table S4.** The mean mass concentrations of various OSs in PM<sub>2.5</sub> at different locations.

| Sampling site |                          | Period | Season | OS <sub>i</sub><br>(ng m <sup>-3</sup> ) | OS <sub>m</sub><br>(ng m <sup>-3</sup> ) | OS <sub>a</sub><br>(ng m <sup>-3</sup> ) | C <sub>2</sub> -C <sub>3</sub><br>(ng m <sup>-3</sup> ) | Total<br>(ng m <sup>-3</sup> ) | Ref.                        |
|---------------|--------------------------|--------|--------|------------------------------------------|------------------------------------------|------------------------------------------|---------------------------------------------------------|--------------------------------|-----------------------------|
| Urban site    | Pearl River Delta, China | 2012   | Summer | 0.68                                     | -                                        | -                                        | -                                                       | 0.68                           | (He et al. 2014)            |
|               | Shanghai, China          | 2012   | Spring | 0.02                                     | 0.20                                     | 0.22                                     | -                                                       | 0.44                           | (Ma et al. 2014)            |
| Summer        |                          |        | 23.10  | 26.70                                    | 0.77                                     | -                                        | 50.57                                                   |                                |                             |
| Autumn        |                          |        | 0.06   | 0.77                                     | 0.79                                     | -                                        | 1.62                                                    |                                |                             |
| Winter        |                          |        | 0.82   | 0.90                                     | 0.72                                     | -                                        | 2.44                                                    |                                |                             |
|               | Beijing, China           | 2016   | Spring | 16.20                                    | 13.00                                    | -                                        | 19.50                                                   | 48.70                          | (Wang et al. 2018)          |
|               | Beijing, China           | 2016   | Summer | 12.30                                    | 15.10                                    | -                                        | -                                                       | 27.40                          | (Wang et al. 2020)          |
| Winter        |                          |        | 2.00   | 6.00                                     | -                                        | -                                        | 8.00                                                    |                                |                             |
|               | Atlanta, GA, USA         | 2014   | Summer | 1122.98                                  | 67.90                                    | -                                        | 58.50                                                   | 1249.38                        | (Hettiyadura et al. 2019)   |
|               | Guangzhou, China         | 2019   | Summer | 181.80                                   | 10.80                                    | -                                        | -                                                       | 192.6                          | (Bryant et al. 2021)        |
|               | Tianjing, China          | 2019   | Winter | 600.00                                   | -                                        | -                                        | -                                                       | 600.00                         | (Ding et al. 2022)          |
|               |                          |        | Summer | 400.00                                   | -                                        | -                                        | -                                                       | 400.00                         |                             |
|               | Patra, Greece            | 2018   | Winter | 31.50                                    | 20.70                                    | 3.10                                     | -                                                       | 55.30                          | (Kanellopoulos et al. 2022) |
|               |                          |        | Spring | 75.70                                    | 32.40                                    | 1.30                                     | -                                                       | 109.40                         |                             |
|               |                          |        | Summer | 658.00                                   | 37.70                                    | 1.60                                     | -                                                       | 697.30                         |                             |
|               |                          |        | Autumn | 53.20                                    | 25.40                                    | 1.10                                     | -                                                       | 79.70                          |                             |
|               | Hong Kong, China         | 2016   | Summer | 163.19                                   | 2.95                                     | -                                        | -                                                       | 166.14                         | (Wang et al. 2022)          |
|               |                          | 2017   | Winter | 97.96                                    | 17.26                                    | -                                        | -                                                       | 115.22                         |                             |
|               | Guangzhou, China         | 2016   | Summer | 460.20                                   | 26.22                                    | -                                        | -                                                       | 486.42                         |                             |
|               |                          | 2017   | Winter | 88.03                                    | 20.96                                    | -                                        | -                                                       | 108.99                         |                             |
|               | Beijing, China           | 2016   | Summer | 236.64                                   | 21.70                                    | -                                        | -                                                       | 258.34                         |                             |
|               |                          | 2017   | Winter | 176.32                                   | 36.01                                    | -                                        | -                                                       | 212.33                         |                             |
|               | Shanghai, China          | 2016   | Summer | 326.40                                   | 34.90                                    | -                                        | -                                                       | 361.30                         |                             |
|               |                          | 2017   | Winter | 70.31                                    | 32.32                                    | -                                        | -                                                       | 102.63                         |                             |

|               |                                               |      |        |         |        |       |        |        |                       |
|---------------|-----------------------------------------------|------|--------|---------|--------|-------|--------|--------|-----------------------|
|               | Copenhagen, Denmark                           | 2011 | Summer | 31.60   | 12.00  | -     | 15.40  | 59.00  | (Nguyen et al. 2014)  |
|               | Xi'an, China                                  | 2014 | Winter | -       | -      | 0.14  | 77.30  | 77.44  | (Huang et al. 2018)   |
|               | Manaus, Brazil                                | 2016 | Summer | 1200.90 | 116.30 | -     | 194.20 |        | (Riva et al. 2019)    |
|               | Birmingham, AL, USA                           | 2013 | Summer | 179.00  | -      | -     | 29.10  | 208.10 |                       |
|               | Mexico City, Mexico                           | 2006 | Spring | 1.50    | -      | -     | -      | 1.50   | (Olson et al. 2011)   |
|               | Rotterdam, Netherlands                        | 2013 | Winter | 3.32    | 22.91  | 9.07  | -      | 35.30  | (Glasius et al. 2018) |
|               | Bakersfield, CA, USA                          | 2010 | Summer | 0.60    | -      | -     | -      | 0.60   | (Olson et al. 2011)   |
|               | Riverside, CA, USA                            | 2005 | Summer | 0.80    | -      | -     | -      | 0.80   |                       |
|               | Cleveland, OH, USA                            | 2007 | Summer | 0.40    | -      | -     | -      | 0.40   |                       |
|               | Lahore, Pakistan                              |      | Winter | 3.80    | -      | 2.02  | -      | 5.82   | (Kundu et al. 2013)   |
|               | Pasadena, USA                                 | 2010 | Summer | -       | -      | 1.03  | -      | 1.03   | (Riva et al. 2015)    |
|               | Dept of Environmental Qualify Fresno, CA, USA | 2016 | Winter | 74.00   | -      | -     | -      | 74.00  | (Chen et al. 2021)    |
|               |                                               |      | Summer | 44.00   | -      | -     | -      | 44.00  |                       |
| Suburban site | Zion, Illinois, USA                           | 2013 | Spring | 121.10  | 8.70   | -     | -      | 129.80 | (Hughes et al. 2021)  |
|               | Towson, MD, USA                               | 2012 | Spring | 3.75    | 2.62   | 1.60  | 0.70   | 8.67   | (Meade et al. 2016)   |
|               |                                               |      | Summer | 19.96   | 0.80   | 1.40  | 0.24   | 22.4   |                       |
|               |                                               |      | Autumn | 2.22    | 2.90   | 1.40  | 0.35   | 6.87   |                       |
|               |                                               |      | Winter | 0.50    | 2.41   | 0.90  | 0.30   | 4.11   |                       |
|               | Lille Valby, Denmark                          | 2009 | Summer | 0.27    | 2.40   | -     | -      | 2.67   | (Yttri et al. 2011)   |
|               | Beijing, China                                | 2016 | Summer | 5.90    | 16.10  | -     | -      | 22.0   | (Wang et al. 2020)    |
|               |                                               |      | Winter | 69.50   | 18.70  | -     | -      | 88.20  |                       |
|               | Wanqingsha, China                             | 2010 | Autumn | 0.85    | 101.70 | -     | -      | 102.55 | (He et al. 2014)      |
|               | Birkenes, Norway                              | 2013 | Winter | 0.96    | 1.53   | 0.65  | -      | 3.14   | (Glasius et al. 2018) |
|               | Risoe, Denmark                                |      | Winter | 2.28    | 6.39   | 2.16  | -      | 10.83  |                       |
|               | Cabauw, Netherlands                           |      | Winter | 1.98    | 16.10  | 6.67  | -      | 24.75  |                       |
| Rural site    | Melpitz, Germany                              |      | Winter | 11.12   | 49.33  | 32.83 | -      | 93.28  |                       |

|  |                                              |      |        |         |       |      |       |         |                                |
|--|----------------------------------------------|------|--------|---------|-------|------|-------|---------|--------------------------------|
|  | Vavihill, Sweden                             |      | Winter | 2.75    | 6.39  | 4.15 | -     | 13.29   |                                |
|  | Centreville, AL, USA                         |      | Summer | 15.40   | -     | 1.16 | 20.83 | 37.39   | (Hettiyadura et al. 2017)      |
|  | Look Rock, TN, USA                           | 2013 | Summer | 180.90  | -     | -    | -     | -       | (Budisulistiorini et al. 2015) |
|  | Wangdu, China                                | 2014 | Summer | -       | 36.70 | -    | -     | 36.70   | (Brüggemann et al. 2019)       |
|  | Yorkville, GA, USA                           | 2010 | Summer | 115.11  | -     | -    | -     | 115.11  | (Lin et al. 2013)              |
|  | Acadia National Park, ME, USA                |      | Summer | 62.00   | -     | -    | -     | 62.00   |                                |
|  | Bondville, IL, USA                           |      | Summer | 83.00   | -     | -    | -     | 83.00   |                                |
|  | Londonderry, NH, USA                         |      | Winter | 3.00    | -     | -    | -     | 3.00    |                                |
|  |                                              |      | Summer | 73.00   |       |      |       | 73.00   |                                |
|  | Great Smoky Mountains National Park, TN, USA |      | Winter | 18.00   | -     | -    | -     | 18.00   |                                |
|  |                                              |      | Summer | 75.00   | -     | -    | -     | 75.00   |                                |
|  | Hawaii Volcanoes National Park, HI, USA      |      | Summer | 3.00    | -     | -    | -     | 3.00    |                                |
|  | Kenai Peninsula Borough, AK, USA             |      | Summer | 58.00   | -     | -    | -     | 58.00   |                                |
|  | Lye Brook Wilderness Area, VT, USA           | 2016 | Summer | 45.00   | -     | -    | -     | 45.00   | (Chen et al. 2021)             |
|  | Mingo National Wildlife Refuge, MO, USA      |      | Summer | 98.00   | -     | -    | -     | 98.00   |                                |
|  | Organ Pipe Cactus National Monument, AZ, USA |      | Winter | 2.00    | -     | -    | -     | 2.00    |                                |
|  |                                              |      | Summer | 3.00    | -     | -    | -     | 3.00    |                                |
|  | Point Reyes National Seashore, CA, USA       |      | Winter | 1.00    | -     | -    | -     | 1.00    |                                |
|  |                                              |      | Summer | 22.00   | -     | -    | -     | 22.00   |                                |
|  | Presque Isle, ME, USA                        |      | Summer | 2130.00 | -     | -    | -     | 2130.00 |                                |
|  | Redwood National Park, CA, USA               |      | Winter | 3.00    | -     | -    | -     | 3.00    |                                |
|  |                                              |      | Summer | 42.00   | -     | -    | -     | 42.00   |                                |

|               |                                              |      |        |         |       |       |       |         |                               |
|---------------|----------------------------------------------|------|--------|---------|-------|-------|-------|---------|-------------------------------|
|               | Rocky Mountain National Park, CO, USA        | 2016 | Winter | 2.00    | -     | -     | -     | 2.00    | (Chen et al. 2021)            |
|               |                                              |      | Summer | 19.00   | -     | -     | -     | 19.00   |                               |
|               | Shining Rock Wilderness, NC, USA             |      | Summer | 1130.00 | -     | -     | -     | 1130.00 |                               |
|               | Snoqualmie Pass, WA                          |      | Winter | 2.00    | -     | -     | -     | 2.00    |                               |
|               |                                              |      | Summer | 24.00   | -     | -     | -     | 24.00   |                               |
|               | Tallgrass Prairie National Preserve, KS, USA |      | Summer | 62.00   | -     | -     | -     | 62.00   |                               |
|               | UL Bend, MT, USA                             |      | Winter | 12.00   | -     | -     | -     | 12.00   |                               |
|               |                                              |      | Summer | 16.00   | -     | -     | -     | 16.00   |                               |
|               | White Pass, WA, USA                          |      | Summer | 9.00    | -     | -     | -     | 9.00    |                               |
| Forest site   | The Green Ocean Amazon                       | 2014 | Spring | 1733.1  | 116.3 | -     | 268.4 | 2117.8  | (Riva et al. 2019)            |
|               | Brasschaat, Belgium                          | 2007 | Summer | 12.07   | 1.51  | -     | -     | 13.58   | (Gómez-González et al. 2012)  |
|               | Fichtelgebirge, Germany                      | 2002 | Summer | -       | 5.00  | -     | -     | 5.00    | (Inuma et al. 2010)           |
|               | Hyytiälä, Finland                            | 2009 | Summer | -       | 4.91  | 1.47  | -     | 6.38    | (Yttri et al. 2011)           |
|               | Silkeborg, Denmark                           | 2008 | Spring | 0.03    | 0.52  | -     | -     | 0.55    | (Kristensen and Glasius 2011) |
| Polar site    | Station Nord, Greenland                      | 2010 | Winter | 5.03    | 0.43  | -     | -     | 5.46    | (Hansen et al. 2014)          |
|               | Zeppelin Mountain, Svalbard                  | 2010 | Winter | 1.34    | 0.14  | -     | -     | 1.48    | (Hansen et al. 2014)          |
| Urban site    | Shanghai, China                              | 2021 | Summer | 85.38   | 30.61 | 19.31 | 23.38 | 158.68  | This study                    |
| Suburban site |                                              |      |        | 48.98   | 19.30 | 15.73 | 18.25 | 102.26  |                               |

114 <sup>a</sup>The symbol of “-” denotes no data.

115

116



117 **Table S5.** The mean values ( $\pm$  SD) of the major parameters observed in different periods in daytime and nighttime.

|                                                                                    | Urban- period A     |                     | Urban- period B     |                      | Suburban-period A   |                     | Suburban-period B   |                      |
|------------------------------------------------------------------------------------|---------------------|---------------------|---------------------|----------------------|---------------------|---------------------|---------------------|----------------------|
|                                                                                    | Daytime             | Nighttime           | Daytime             | Nighttime            | Daytime             | Nighttime           | Daytime             | Nighttime            |
| T (°C)                                                                             | 33.64 $\pm$ 0.98    | 29.16 $\pm$ 0.25    | 30.93 $\pm$ 0.78    | 27.95 $\pm$ 0.62     | 33.64 $\pm$ 0.98    | 29.16 $\pm$ 0.25    | 30.93 $\pm$ 0.78    | 27.95 $\pm$ 0.62     |
| RH (%)                                                                             | 73.45 $\pm$ 3.57    | 89.84 $\pm$ 1.83    | 75.88 $\pm$ 3.84    | 90.59 $\pm$ 1.85     | 73.45 $\pm$ 3.57    | 89.84 $\pm$ 1.83    | 75.88 $\pm$ 3.84    | 90.59 $\pm$ 1.85     |
| Wind speed                                                                         | 2.08 $\pm$ 0.66     | 1.97 $\pm$ 0.46     | 2.61 $\pm$ 0.19     | 2.17 $\pm$ 0.42      | 2.08 $\pm$ 0.66     | 1.97 $\pm$ 0.46     | 2.61 $\pm$ 0.19     | 2.17 $\pm$ 0.42      |
| PBLH (m)                                                                           | 459.17 $\pm$ 59.02  | 333.61 $\pm$ 36.65  | 919.17 $\pm$ 189.63 | 574.63 $\pm$ 83.41   | 459.17 $\pm$ 59.02  | 333.61 $\pm$ 36.65  | 919.17 $\pm$ 189.63 | 574.63 $\pm$ 83.41   |
| UV (w/m <sup>2</sup> )                                                             | 21.87 $\pm$ 3.97    | 0.38 $\pm$ 0.01     | 21.17 $\pm$ 3.13    | 0.37 $\pm$ 0.01      | 21.87 $\pm$ 3.97    | 0.38 $\pm$ 0.01     | 21.17 $\pm$ 3.13    | 0.37 $\pm$ 0.01      |
| VC                                                                                 | 951.89 $\pm$ 294.19 | 668.68 $\pm$ 220.05 | 2377.4 $\pm$ 378.6  | 1258.67 $\pm$ 334.63 | 951.89 $\pm$ 294.19 | 668.68 $\pm$ 220.05 | 2377.4 $\pm$ 378.6  | 1258.67 $\pm$ 334.63 |
| NO <sub>2</sub> (ppb)                                                              | 8.13 $\pm$ 1.80     | 9.25 $\pm$ 1.65     | 3.76 $\pm$ 1.31     | 5.01 $\pm$ 1.31      | 9.14 $\pm$ 1.26     | 9.76 $\pm$ 2.99     | 3.82 $\pm$ 1.75     | 5.80 $\pm$ 2.28      |
| NO (ppb)                                                                           | 0.47 $\pm$ 0.56     | 1.91 $\pm$ 0.38     | 0.70 $\pm$ 0.51     | 1.25 $\pm$ 1.02      | 2.13 $\pm$ 0.55     | 1.93 $\pm$ 0.29     | 1.98 $\pm$ 0.31     | 2.37 $\pm$ 0.53      |
| O <sub>3</sub> (ppb)                                                               | 70.28 $\pm$ 8.44    | 28.98 $\pm$ 8.70    | 31.79 $\pm$ 9.08    | 15.55 $\pm$ 7.48     | 59.73 $\pm$ 11.47   | 24.69 $\pm$ 7.79    | 29.43 $\pm$ 8.07    | 16.21 $\pm$ 8.68     |
| SO <sub>2</sub> (ppb)                                                              | 3.08 $\pm$ 0.71     | 2.20 $\pm$ 0.36     | 1.65 $\pm$ 0.50     | 1.68 $\pm$ 0.72      | 2.37 $\pm$ 0.09     | 2.21 $\pm$ 0.08     | 2.21 $\pm$ 0.11     | 2.19 $\pm$ 0.13      |
| ALW (ug m <sup>-3</sup> )                                                          | 3.26 $\pm$ 1.64     | 5.14 $\pm$ 3.53     | 1.40 $\pm$ 0.80     | 2.57 $\pm$ 2.20      | 1.29 $\pm$ 1.15     | 2.15 $\pm$ 1.24     | 1.70 $\pm$ 1.26     | 2.55 $\pm$ 2.86      |
| pH                                                                                 | 2.08 $\pm$ 0.48     | 2.14 $\pm$ 0.31     | 3.10 $\pm$ 1.06     | 2.68 $\pm$ 0.98      | 2.21 $\pm$ 0.62     | 2.13 $\pm$ 0.35     | 2.56 $\pm$ 1.09     | 1.99 $\pm$ 0.43      |
| OM (ug m <sup>-3</sup> )                                                           | 23.39 $\pm$ 4.64    | 15.38 $\pm$ 4.26    | 7.02 $\pm$ 2.78     | 3.91 $\pm$ 1.25      | 12.23 $\pm$ 3.51    | 8.72 $\pm$ 4.24     | 4.18 $\pm$ 2.59     | 2.55 $\pm$ 1.11      |
| EC (ug m <sup>-3</sup> )                                                           | 4.34 $\pm$ 1.24     | 3.71 $\pm$ 1.05     | 1.05 $\pm$ 0.94     | 0.38 $\pm$ 0.29      | 2.16 $\pm$ 0.92     | 1.51 $\pm$ 0.92     | 0.49 $\pm$ 0.86     | 0.21 $\pm$ 0.22      |
| NO <sub>3</sub> <sup>-</sup> (ug m <sup>-3</sup> )                                 | 2.60 $\pm$ 0.71     | 3.09 $\pm$ 2.18     | 1.44 $\pm$ 0.25     | 0.92 $\pm$ 0.14      | 2.28 $\pm$ 0.59     | 2.29 $\pm$ 2.12     | 1.11 $\pm$ 0.20     | 1.09 $\pm$ 1.02      |
| SO <sub>4</sub> <sup>2-</sup> (ug m <sup>-3</sup> )                                | 5.29 $\pm$ 1.65     | 4.10 $\pm$ 1.22     | 2.41 $\pm$ 1.18     | 2.00 $\pm$ 1.28      | 3.08 $\pm$ 1.02     | 2.23 $\pm$ 0.52     | 2.29 $\pm$ 1.21     | 2.13 $\pm$ 1.82      |
| PM <sub>2.5</sub> (ug m <sup>-3</sup> )                                            | 31.75 $\pm$ 8.68    | 25.67 $\pm$ 9.12    | 12.54 $\pm$ 2.22    | 10.80 $\pm$ 3.10     | 27.91 $\pm$ 10.49   | 20.82 $\pm$ 8.25    | 10.75 $\pm$ 2.08    | 10.46 $\pm$ 3.95     |
| Total OSs (ng m <sup>-3</sup> )                                                    | 498.72 $\pm$ 249.22 | 272.38 $\pm$ 147.84 | 67.13 $\pm$ 24.53   | 48.55 $\pm$ 17.15    | 241.83 $\pm$ 123.49 | 175.04 $\pm$ 96.13  | 64.65 $\pm$ 18.61   | 49.4 $\pm$ 18.08     |
| OS <sub>i</sub> (ng m <sup>-3</sup> )                                              | 289.18 $\pm$ 145.14 | 146.30 $\pm$ 103.80 | 32.04 $\pm$ 16.37   | 19.43 $\pm$ 11.77    | 132.56 $\pm$ 75.86  | 75.98 $\pm$ 42.35   | 29.21 $\pm$ 13.08   | 20.41 $\pm$ 12.23    |
| C <sub>3</sub> H <sub>11</sub> O <sub>7</sub> S <sup>-</sup> (ng m <sup>-3</sup> ) | 136.47 $\pm$ 71.59  | 66.77 $\pm$ 55.60   | 11.93 $\pm$ 8.75    | 8.07 $\pm$ 7.06      | 54.26 $\pm$ 36.67   | 30.08 $\pm$ 19.65   | 11.33 $\pm$ 6.48    | 8.52 $\pm$ 6.89      |
| NOS <sub>i</sub> (ng m <sup>-3</sup> )                                             | 13.33 $\pm$ 11.18   | 19.24 $\pm$ 13.08   | 0.81 $\pm$ 0.25     | 0.62 $\pm$ 0.30      | 4.19 $\pm$ 2.53     | 5.58 $\pm$ 3.81     | 0.8 $\pm$ 0.28      | 0.62 $\pm$ 0.35      |
| OS <sub>m</sub> (ng m <sup>-3</sup> )                                              | 105.86 $\pm$ 70.67  | 55.97 $\pm$ 26.08   | 8.09 $\pm$ 3.16     | 8.73 $\pm$ 3.96      | 42.14 $\pm$ 27.33   | 51.62 $\pm$ 52.67   | 8.88 $\pm$ 1.88     | 7.64 $\pm$ 2.34      |
| C <sub>8</sub> H <sub>13</sub> O <sub>7</sub> S <sup>-</sup> (ng m <sup>-3</sup> ) | 27.70 $\pm$ 21.05   | 9.95 $\pm$ 6.43     | 1.64 $\pm$ 0.75     | 0.93 $\pm$ 0.27      | 10.29 $\pm$ 7.28    | 32.00 $\pm$ 49.38   | 1.39 $\pm$ 0.40     | 0.95 $\pm$ 0.34      |
| NOS <sub>m</sub> (ng m <sup>-3</sup> )                                             | 1.57 $\pm$ 0.58     | 6.63 $\pm$ 0.48     | 0.46 $\pm$ 0.26     | 1.66 $\pm$ 1.18      | 1.12 $\pm$ 0.20     | 2.44 $\pm$ 0.29     | 0.49 $\pm$ 0.24     | 1.21 $\pm$ 0.55      |
| C <sub>2</sub> -C <sub>3</sub> OS (ng m <sup>-3</sup> )                            | 63.51 $\pm$ 19.82   | 41.10 $\pm$ 11.74   | 12.55 $\pm$ 4.68    | 9.27 $\pm$ 3.57      | 41.73 $\pm$ 13.50   | 27.81 $\pm$ 8.65    | 12.38 $\pm$ 4.39    | 9.85 $\pm$ 4.15      |
| OS <sub>a</sub> (ng m <sup>-3</sup> )                                              | 40.17 $\pm$ 16.25   | 29.01 $\pm$ 6.92    | 14.45 $\pm$ 1.64    | 11.12 $\pm$ 1.91     | 25.40 $\pm$ 8.12    | 19.63 $\pm$ 3.45    | 14.18 $\pm$ 1.06    | 11.5 $\pm$ 0.90      |

118

119

120

121

122

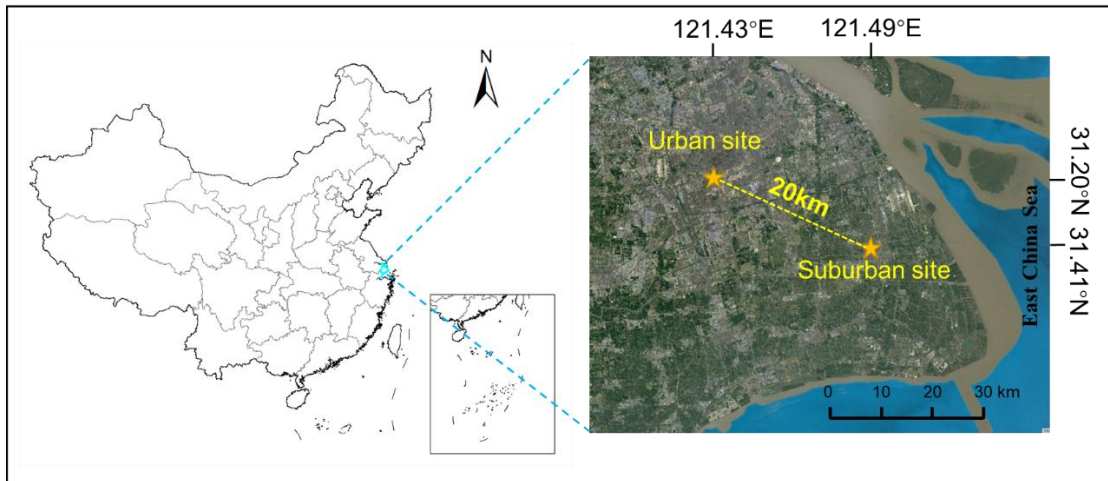

123

124 **Figure S1.** The locations of the sampling sites. The map was derived from ©Baidu Maps

125 (BIDU, China).

126

127

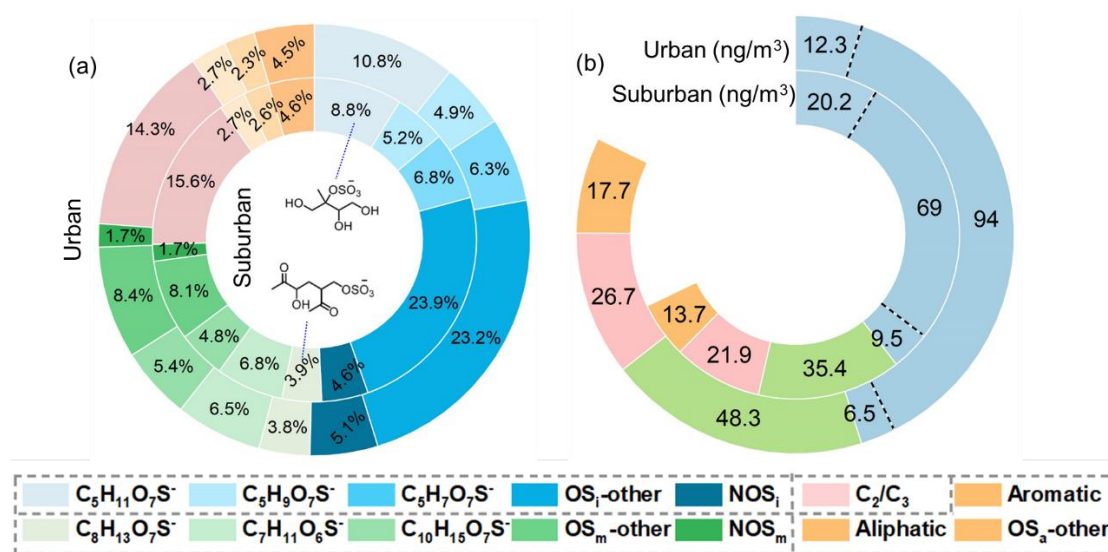

129

130 **Figure S2.** Average distributions in (a) mass concentrations and (b) mass fractions of131 various OSs in PM<sub>2.5</sub> collected in urban and suburban Shanghai in September 2020.

132

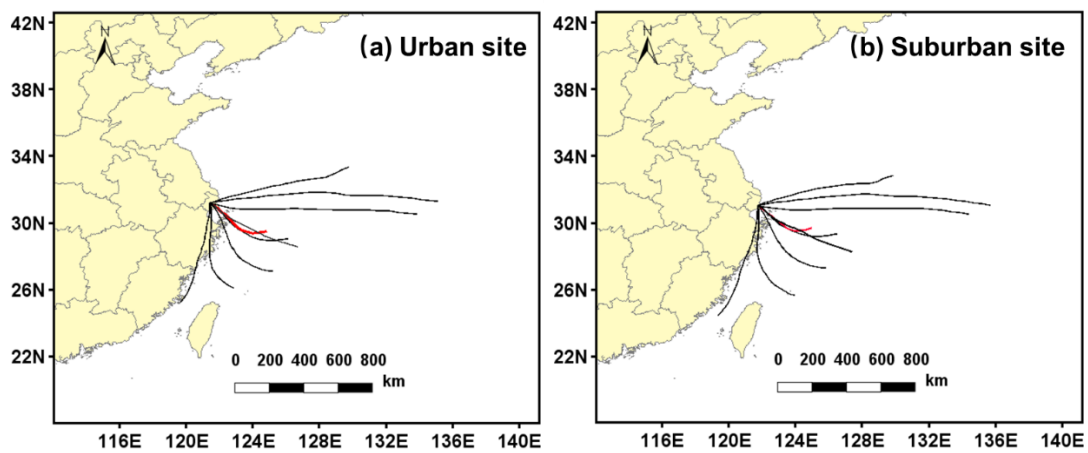

133

134 **Figure S3.** The 1-day (24 h) backward trajectories showing the daily air mass flows to

135 the (a) urban and (b) suburban sites during period B.

136

137

138

139

140

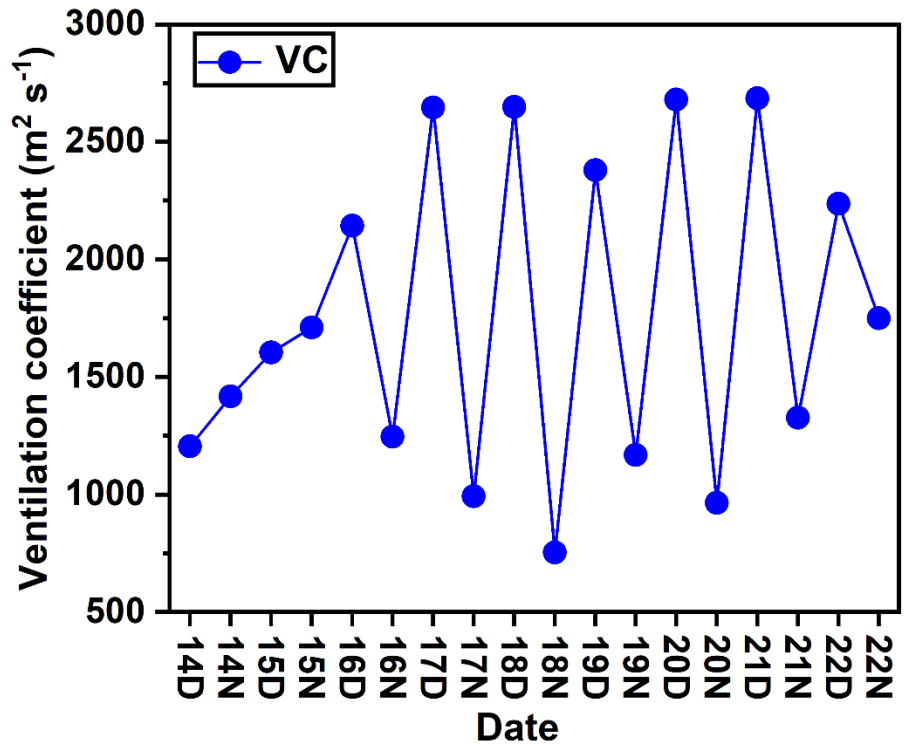

141

142 **Figure S4.** The temporal variations of ventilation coefficient (VC) during the sampling

143 period.

144

145

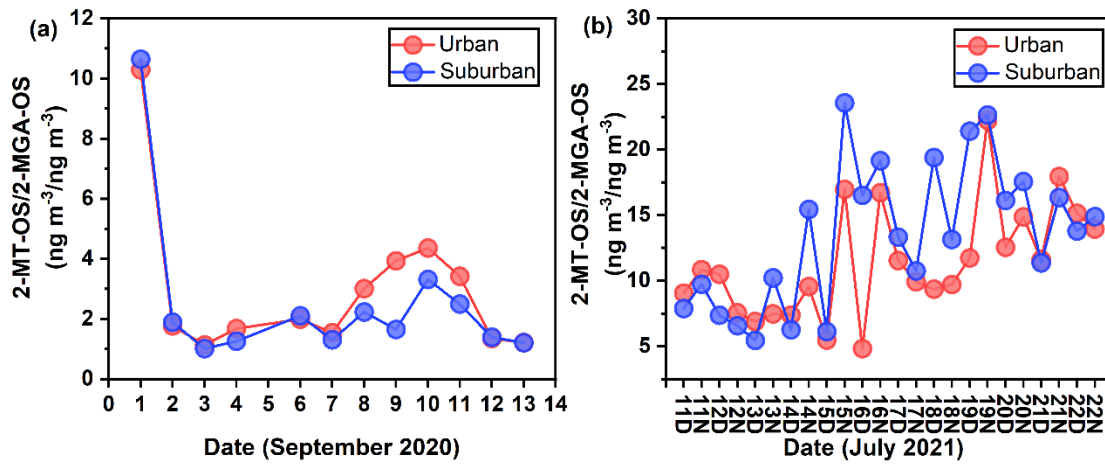

146

147 **Figure S5.** The temporal variations of the ratio of 2-MT-OS to 2-MGA-OS during (a)

148 2020 and (b) 2021 sampling campaigns.

149

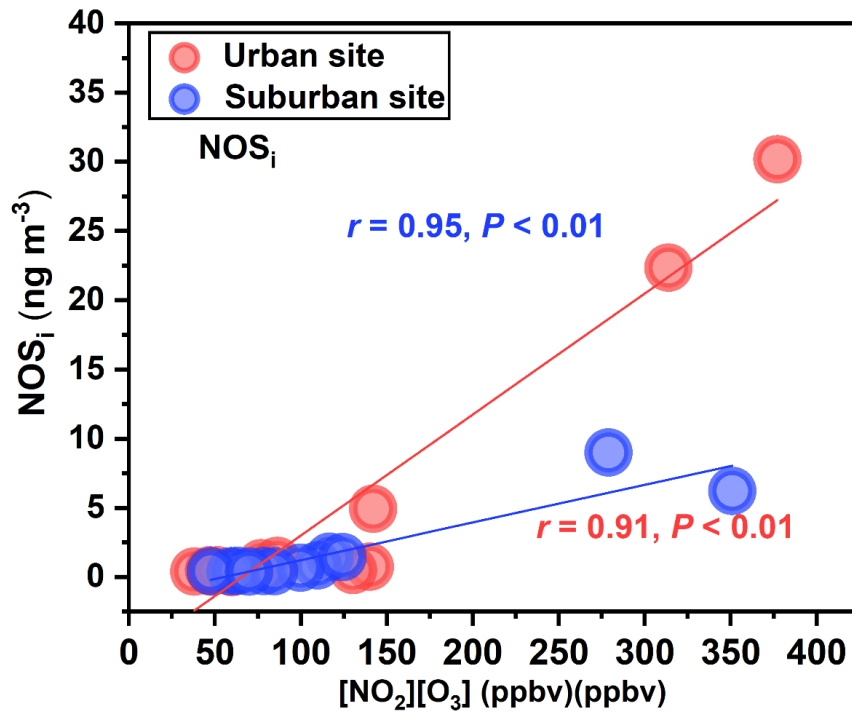

150

151 **Figure S6.** Scatterplots of the products of NO<sub>2</sub> and O<sub>3</sub> concentrations with the mass  
 152 concentrations of NOS<sub>i</sub> in PM<sub>2.5</sub> collected in the urban and suburban areas. Red and  
 153 blue lines show regression lines at the urban and suburban sites, respectively.

154

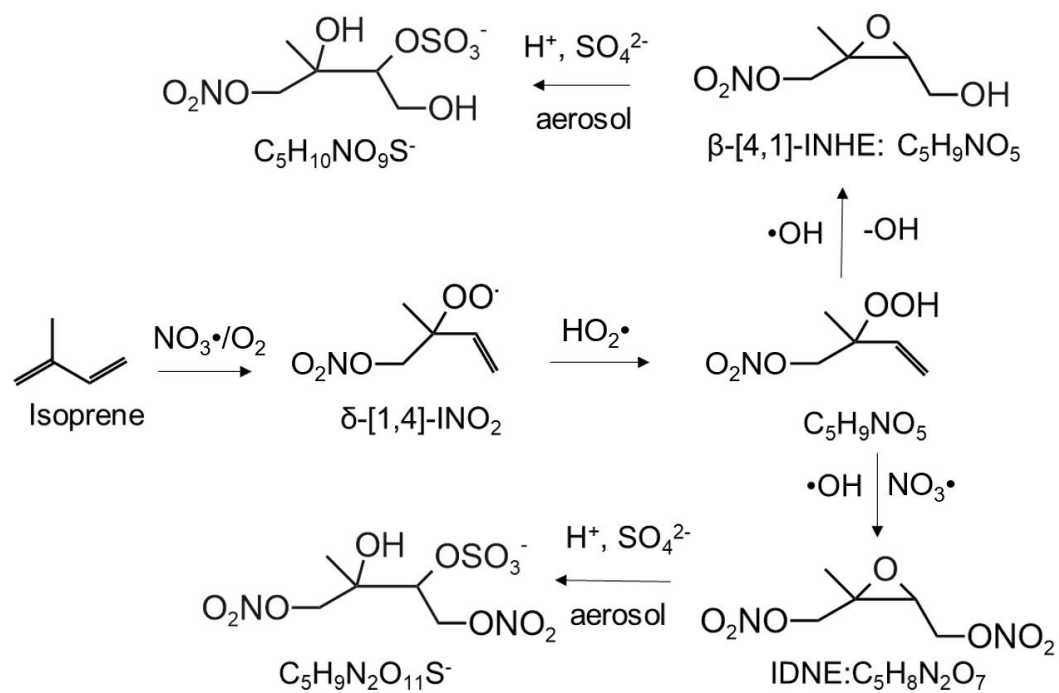

156

157 **Figure S7.** Possible formation mechanisms of  $\text{C}_5\text{H}_{10}\text{NO}_9\text{S}^-$  and  $\text{C}_5\text{H}_9\text{N}_2\text{O}_{11}\text{S}^-$ .

158

159

160

161

162

163

164

165

166

167

168

169

170

171

172

173

174

175

176

177

178

179

180



181  
182

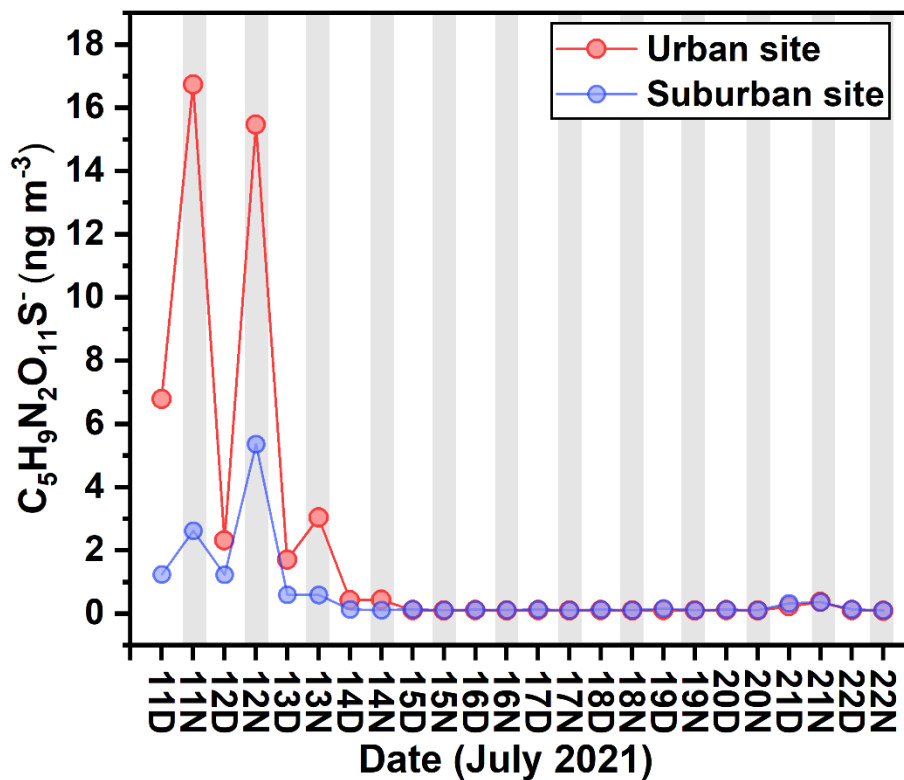

183

184 **Figure S8.** Temporal variations in the concentration of  $C_5H_9N_2O_{11}S^-$ .

185

186

187

188

189

190

191 **REFERENCES**

- 192 Berndt, T., Mentler, B., Scholz, W., Fischer, L., Herrmann, H., Kulmala, M., and Hansel,  
193 A.: Accretion Product Formation from Ozonolysis and OH Radical Reaction of  
194 alpha-Pinene: Mechanistic Insight and the Influence of Isoprene and Ethylene,  
195 Environ. Sci. Technol., 52, 11069-11077, 10.1021/acs.est.8b02210, 2018.
- 196 Berndt, T., Richters, S., Jokinen, T., Hyttinen, N., Kurten, T., Otkjaer, R. V., Kjaergaard,  
197 H. G., Stratmann, F., Herrmann, H., Sipila, M., Kulmala, M., and Ehn, M.:  
198 Hydroxyl radical-induced formation of highly oxidized organic compounds,  
199 Nat. Commun., 7, 13677, 10.1038/ncomms13677, 2016.
- 200 Boyd, C. M., Sanchez, J., Xu, L., Eugene, A. J., Nah, T., Tuet, W. Y., Guzman, M. I.,  
201 and Ng, N. L.: Secondary organic aerosol formation from the  $\beta$ -  
202 pinene+NO<sub>3</sub> system: effect of humidity and peroxy  
203 radical fate, Atmos. Chem. Phys., 15, 7497-7522, 10.5194/acp-15-7497-2015,  
204 2015.
- 205 Brüggemann, M., van Pinxteren, D., Wang, Y., Yu, J. Z., and Herrmann, H.:  
206 Quantification of known and unknown terpenoid organosulfates in PM10 using  
207 untargeted LC–HRMS/MS: contrasting summertime rural Germany and the  
208 North China Plain, Environmental Chemistry, 16, 10.1071/en19089, 2019.
- 209 Bryant, D. J., Elzein, A., Newland, M., White, E., Swift, S., Watkins, A., Deng, W.,  
210 Song, W., Wang, S., Zhang, Y., Wang, X., Rickard, A. R., and Hamilton, J. F.:  
211 Importance of Oxidants and Temperature in the Formation of Biogenic  
212 Organosulfates and Nitrooxy Organosulfates, ACS Earth Space Chem., 5, 2291-

213 2306, 10.1021/acsearthspacechem.1c00204, 2021.

214 Budisulistiorini, S. H., Li, X., Bairai, S. T., Renfro, J., Liu, Y., Liu, Y. J., McKinney, K.  
215 A., Martin, S. T., McNeill, V. F., Pye, H. O. T., Nenes, A., Neff, M. E., Stone, E.  
216 A., Mueller, S., Knote, C., Shaw, S. L., Zhang, Z., Gold, A., and Surratt, J. D.:  
217 Examining the effects of anthropogenic emissions on isoprene-derived  
218 secondary organic aerosol formation during the 2013 Southern Oxidant and  
219 Aerosol Study (SOAS) at the Look Rock, Tennessee ground site, *Atmospheric*  
220 *Chemistry and Physics*, 15, 8871-8888, 10.5194/acp-15-8871-2015, 2015.

221 Chen, Y., Dombek, T., Hand, J., Zhang, Z., Gold, A., Ault, A. P., Levine, K. E., and  
222 Surratt, J. D.: Seasonal Contribution of Isoprene-Derived Organosulfates to  
223 Total Water-Soluble Fine Particulate Organic Sulfur in the United States, *ACS*  
224 *Earth and Space Chemistry*, 5, 2419-2432,  
225 10.1021/acsearthspacechem.1c00102, 2021.

226 Ding, S., Chen, Y., Devineni, S. R., Pavuluri, C. M., and Li, X. D.: Distribution  
227 characteristics of organosulfates (OSs) in PM<sub>2.5</sub> in Tianjin, Northern China:  
228 Quantitative analysis of total and three OS species, *Sci. Total. Environ.*, 834,  
229 155314, 10.1016/j.scitotenv.2022.155314, 2022.

230 Ehn, M., Kleist, E., Junninen, H., Petäjä, T., Lönn, G., Schobesberger, S., Dal Maso,  
231 M., Trimborn, A., Kulmala, M., Worsnop, D. R., Wahner, A., Wildt, J., and  
232 Mentel, T. F.: Gas phase formation of extremely oxidized pinene reaction  
233 products in chamber and ambient air, *Atmos. Chem. Phys.*, 12, 5113-5127,  
234 10.5194/acp-12-5113-2012, 2012.

235 Ehn, M., Thornton, J. A., Kleist, E., Sipila, M., Junninen, H., Pullinen, I., Springer, M.,  
236 Rubach, F., Tillmann, R., Lee, B., Lopez-Hilfiker, F., Andres, S., Acir, I. H.,  
237 Rissanen, M., Jokinen, T., Schobesberger, S., Kangasluoma, J., Kontkanen, J.,  
238 Nieminen, T., Kurten, T., Nielsen, L. B., Jorgensen, S., Kjaergaard, H. G.,  
239 Canagaratna, M., Maso, M. D., Berndt, T., Petaja, T., Wahner, A., Kerminen, V.  
240 M., Kulmala, M., Worsnop, D. R., Wildt, J., and Mentel, T. F.: A large source of  
241 low-volatility secondary organic aerosol, *Nature*, 506, 476-479,  
242 10.1038/nature13032, 2014.

243 Glasius, M., Hansen, A. M. K., Claeys, M., Henzing, J. S., Jedynska, A. D., Kasper-  
244 Giebl, A., Kistler, M., Kristensen, K., Martinsson, J., Maenhaut, W., Nøjgaard,  
245 J. K., Spindler, G., Stenström, K. E., Swietlicki, E., Szidat, S., Simpson, D., and  
246 Yttri, K. E.: Composition and sources of carbonaceous aerosols in Northern  
247 Europe during winter, *Atmospheric Environment*, 173, 127-141,  
248 10.1016/j.atmosenv.2017.11.005, 2018.

249 Gómez-González, Y., Wang, W., Vermeylen, R., Chi, X., Neiryneck, J., Janssens, I. A.,  
250 Maenhaut, W., and Claeys, M.: Chemical characterisation of atmospheric  
251 aerosols during a 2007 summer field campaign at Brasschaat, Belgium: sources  
252 and source processes of biogenic secondary organic aerosol, *Atmospheric  
253 Chemistry and Physics*, 12, 125-138, 10.5194/acp-12-125-2012, 2012.

254 Guo, Y., Yan, C., Liu, Y., Qiao, X., Zheng, F., Zhang, Y., Zhou, Y., Li, C., Fan, X., Lin,  
255 Z., Feng, Z., Zhang, Y., Zheng, P., Tian, L., Nie, W., Wang, Z., Huang, D.,  
256 Daellenbach, K. R., Yao, L., Dada, L., Bianchi, F., Jiang, J., Liu, Y., Kerminen,

257 V.-M., and Kulmala, M.: Seasonal variation in oxygenated organic molecules in  
258 urban Beijing and their contribution to secondary organic aerosol, *Atmos. Chem.*  
259 *Phys.*, 22, 10077-10097, 10.5194/acp-22-10077-2022, 2022.

260 Hansen, A. M. K., Kristensen, K., Nguyen, Q. T., Zare, A., Cozzi, F., Nøjgaard, J. K.,  
261 Skov, H., Brandt, J., Christensen, J. H., Ström, J., Tunved, P., Krejci, R., and  
262 Glasius, M.: Organosulfates and organic acids in Arctic aerosols: speciation,  
263 annual variation and concentration levels, *Atmos. Chem. Phys.*, 14, 7807-7823,  
264 10.5194/acp-14-7807-2014, 2014.

265 He, Q. F., Ding, X., Wang, X. M., Yu, J. Z., Fu, X. X., Liu, T. Y., Zhang, Z., Xue, J.,  
266 Chen, D. H., Zhong, L. J., and Donahue, N. M.: Organosulfates from pinene and  
267 isoprene over the Pearl River Delta, South China: seasonal variation and  
268 implication in formation mechanisms, *Environ Sci Technol*, 48, 9236-9245,  
269 10.1021/es501299v, 2014.

270 Hettiyadura, A. P. S., Al-Naiema, I. M., Hughes, D. D., Fang, T., and Stone, E. A.:  
271 Organosulfates in Atlanta, Georgia: anthropogenic influences on biogenic  
272 secondary organic aerosol formation, *Atmos. Chem. Phys.*, 19, 3191-3206,  
273 10.5194/acp-19-3191-2019, 2019.

274 Hettiyadura, A. P. S., Stone, E. A., Kundu, S., Baker, Z., Geddes, E., Richards, K., and  
275 Humphry, T.: Determination of atmospheric organosulfates using HILIC  
276 chromatography with MS detection, *Atoms. Meas. Tech.*, 8, 2347-2358,  
277 10.5194/amt-8-2347-2015, 2015.

278 Hettiyadura, A. P. S., Jayarathne, T., Baumann, K., Goldstein, A. H., de Gouw, J. A.,

279 Koss, A., Keutsch, F. N., Skog, K., and Stone, E. A.: Qualitative and quantitative  
280 analysis of atmospheric organosulfates in Centreville, Alabama, *Atmos. Chem.*  
281 *Phys.*, 17, 1343-1359, 10.5194/acp-17-1343-2017, 2017.

282 Huang, R.-J., Cao, J., Chen, Y., Yang, L., Shen, J., You, Q., Wang, K., Lin, C., Xu, W.,  
283 Gao, B., Li, Y., Chen, Q., Hoffmann, T., O'Dowd, C. D., Bilde, M., and Glasius,  
284 M.: Organosulfates in atmospheric aerosol: synthesis and quantitative analysis  
285 of PM<sub>2.5</sub> from Xi'an, northwestern China, *Atmos. Meas. Tech.*, 11, 3447-3456,  
286 10.5194/amt-11-3447-2018, 2018.

287 Hughes, D. D., Christiansen, M. B., Milani, A., Vermeuel, M. P., Novak, G. A., Alwe,  
288 H. D., Dickens, A. F., Pierce, R. B., Millet, D. B., Bertram, T. H., Stanier, C. O.,  
289 and Stone, E. A.: PM<sub>2.5</sub> chemistry, organosulfates, and secondary organic  
290 aerosol during the 2017 Lake Michigan Ozone Study, *Atmos. Environ.*, 244,  
291 10.1016/j.atmosenv.2020.117939, 2021.

292 Iinuma, Y., Böge, O., Gräfe, R., and Herrmann, H.: Methyl-Nitrocatechols:  
293 Atmospheric Tracer Compounds for Biomass Burning Secondary Organic  
294 Aerosols, *Environ. Sci. Technol.*, 44, 8453-8459,  
295 <https://doi.org/10.1021/es070938t>, 2010.

296 Jiang, H., Li, J., Tang, J., Cui, M., Zhao, S., Mo, Y., Tian, C., Zhang, X., Jiang, B., Liao,  
297 Y., Chen, Y., and Zhang, G.: Molecular characteristics, sources, and formation  
298 pathways of organosulfur compounds in ambient aerosol in Guangzhou, South  
299 China, *Atmos. Chem. Phys.*, 22, 6919-6935, 10.5194/acp-22-6919-2022, 2022.

300 Jokinen, T., Sipilä, M., Richters, S., Kerminen, V. M., Paasonen, P., Stratmann, F.,

301 Worsnop, D., Kulmala, M., Ehn, M., Herrmann, H., and Berndt, T.: Rapid  
302 autoxidation forms highly oxidized RO<sub>2</sub> radicals in the atmosphere, *Angew.*  
303 *Chem. Int. Ed. Engl.*, 53, 14596-14600, 10.1002/anie.201408566, 2014.

304 Kanellopoulos, P. G., Kotsaki, S. P., Chrysochou, E., Koukoulakis, K., Zacharopoulos,  
305 N., Philippopoulos, A., and Bakeas, E.: PM<sub>2.5</sub>-bound organosulfates in two  
306 Eastern Mediterranean cities: The dominance of isoprene organosulfates,  
307 *Chemosphere*, 297, 134103, 10.1016/j.chemosphere.2022.134103, 2022.

308 Kristensen, K. and Glasius, M.: Organosulfates and oxidation products from biogenic  
309 hydrocarbons in fine aerosols from a forest in North West Europe during spring,  
310 *Atmos. Environ.*, 45, 4546-4556, 10.1016/j.atmosenv.2011.05.063, 2011.

311 Kundu, S., Quraishi, T. A., Yu, G., Suarez, C., Keutsch, F. N., and Stone, E. A.: Evidence  
312 and quantitation of aromatic organosulfates in ambient aerosols in Lahore,  
313 Pakistan, *Atmospheric Chemistry and Physics*, 13, 4865-4875, 10.5194/acp-13-  
314 4865-2013, 2013.

315 Lin, Y. H., Knipping, E. M., Edgerton, E. S., Shaw, S. L., and Surratt, J. D.:  
316 Investigating the influences of SO<sub>2</sub> and  
317 NH<sub>3</sub> levels on isoprene-derived secondary organic  
318 aerosol formation using conditional sampling approaches, *Atmospheric*  
319 *Chemistry and Physics*, 13, 8457-8470, 10.5194/acp-13-8457-2013, 2013.

320 Ma, J., Ungeheuer, F., Zheng, F., Du, W., Wang, Y., Cai, J., Zhou, Y., Yan, C., Liu, Y.,  
321 Kulmala, M., Daellenbach, K. R., and Vogel, A. L.: Nontarget Screening  
322 Exhibits a Seasonal Cycle of PM<sub>2.5</sub> Organic Aerosol Composition in Beijing,

323 Environ. Sci. Technol., 56, 7017-7028, 10.1021/acs.est.1c06905, 2022.

324 Ma, Y., Xu, X., Song, W., Geng, F., and Wang, L.: Seasonal and diurnal variations of  
325 particulate organosulfates in urban Shanghai, China, Atmos. Environ., 85, 152-  
326 160, 10.1016/j.atmosenv.2013.12.017, 2014.

327 Meade, L. E., Riva, M., Blomberg, M. Z., Brock, A. K., Qualters, E. M., Siejack, R. A.,  
328 Ramakrishnan, K., Surratt, J. D., and Kautzman, K. E.: Seasonal variations of  
329 fine particulate organosulfates derived from biogenic and anthropogenic  
330 hydrocarbons in the mid-Atlantic United States, Atmospheric Environment, 145,  
331 405-414, 10.1016/j.atmosenv.2016.09.028, 2016.

332 Nestorowicz, K., Jaoui, M., Rudzinski, K. J., Lewandowski, M., Kleindienst, T. E.,  
333 Spolnik, G., Danikiewicz, W., and Szmigielski, R.: Chemical composition of  
334 isoprene SOA under acidic and non-acidic conditions: effect of relative  
335 humidity, Atmos Chem Phys, 18, 18101-18121, 10.5194/acp-18-18101-2018,  
336 2018.

337 Nguyen, Q. T., Christensen, M. K., Cozzi, F., Zare, A., Hansen, A. M. K., Kristensen,  
338 K., Tulinius, T. E., Madsen, H. H., Christensen, J. H., Brandt, J., Massling, A.,  
339 Nøjgaard, J. K., and Glasius, M.: Understanding the anthropogenic influence on  
340 formation of biogenic secondary organic aerosols in Denmark via analysis of  
341 organosulfates and related oxidation products, Atmos. Chem. Phys., 14, 8961-  
342 8981, 10.5194/acp-14-8961-2014, 2014.

343 Nozière, B., Ekström, S., Alsberg, T., and Holmström, S.: Radical-initiated formation  
344 of organosulfates and surfactants in atmospheric aerosols, Geophys. Res. Lett.,



345 37, n/a-n/a, 10.1029/2009gl041683, 2010.

346 Olson, C. N., Galloway, M. M., Yu, G., Hedman, C. J., Lockett, M. R., Yoon, T., Stone,  
347 E. A., Smith, L. M., and Keutsch, F. N.: Hydroxycarboxylic acid-derived  
348 organosulfates: synthesis, stability, and quantification in ambient aerosol,  
349 *Environ Sci Technol*, 45, 6468-6474, 10.1021/es201039p, 2011.

350 Riva, M., Budisulistiorini, S. H., Zhang, Z., Gold, A., and Surratt, J. D.: Chemical  
351 characterization of secondary organic aerosol constituents from isoprene  
352 ozonolysis in the presence of acidic aerosol, *Atmospheric Environment*, 130, 5-  
353 13, 10.1016/j.atmosenv.2015.06.027, 2016a.

354 Riva, M., Da Silva Barbosa, T., Lin, Y. H., Stone, E. A., Gold, A., and Surratt, J. D.:  
355 Chemical characterization of organosulfates in secondary organic aerosol  
356 derived from the photooxidation of alkanes, *Atmos. Chem. Phys.*, 16, 11001-  
357 11018, 10.5194/acp-16-11001-2016, 2016b.

358 Riva, M., Tomaz, S., Cui, T., Lin, Y. H., Perraudin, E., Gold, A., Stone, E. A., Villenave,  
359 E., and Surratt, J. D.: Evidence for an unrecognized secondary anthropogenic  
360 source of organosulfates and sulfonates: gas-phase oxidation of polycyclic  
361 aromatic hydrocarbons in the presence of sulfate aerosol, *Environ. Sci. Technol.*,  
362 49, 6654-6664, 10.1021/acs.est.5b00836, 2015.

363 Riva, M., Chen, Y., Zhang, Y., Lei, Z., Olson, N. E., Boyer, H. C., Narayan, S., Yee, L.  
364 D., Green, H. S., Cui, T., Zhang, Z., Baumann, K., Fort, M., Edgerton, E.,  
365 Budisulistiorini, S. H., Rose, C. A., Ribeiro, I. O., RL, E. O., Dos Santos, E. O.,  
366 Machado, C. M. D., Szopa, S., Zhao, Y., Alves, E. G., de Sa, S. S., Hu, W.,

367 Knipping, E. M., Shaw, S. L., Duvoisin Junior, S., de Souza, R. A. F., Palm, B.  
368 B., Jimenez, J. L., Glasius, M., Goldstein, A. H., Pye, H. O. T., Gold, A., Turpin,  
369 B. J., Vizuete, W., Martin, S. T., Thornton, J. A., Dutcher, C. S., Ault, A. P., and  
370 Surratt, J. D.: Increasing Isoprene Epoxydiol-to-Inorganic Sulfate Aerosol Ratio  
371 Results in Extensive Conversion of Inorganic Sulfate to Organosulfur Forms:  
372 Implications for Aerosol Physicochemical Properties, *Environ. Sci. Technol.*, *53*,  
373 8682-8694, 10.1021/acs.est.9b01019, 2019.

374 Schindelka, J., Iinuma, Y., Hoffmann, D., and Herrmann, H.: Sulfate radical-initiated  
375 formation of isoprene-derived organosulfates in atmospheric aerosols, *Faraday*  
376 *Discuss.*, *165*, 237-259, 10.1039/c3fd00042g, 2013.

377 Shalamzari, M. S., Ryabtsova, O., Kahnt, A., Vermeylen, R., Herent, M. F., Quetin-  
378 Leclercq, J., Van der Veken, P., Maenhaut, W., and Claeys, M: Mass  
379 spectrometric characterization of organosulfates related to secondary organic  
380 aerosol from isoprene, *Rapid Commun. Mass Spectrom.*, 784-794,  
381 10.1002/rcm.6511, 2013, 2013.

382 Surratt, J. D., Lewandowski, M., Offenberg, J. H., Jaoui, M., Kleindienst, T.E., Edney,  
383 E. O., and Seinfeld, J. H.: Effect of Acidity on Secondary Organic Aerosol  
384 Formation from Isoprene, *Environ. Sci. Technol.*, *41*, 5363–5369, 2007.

385 Surratt, J. D., Chan, A. W., Eddingsaas, N. C., Chan, M., Loza, C. L., Kwan, A. J.,  
386 Hersey, S. P., Flagan, R. C., Wennberg, P. O., and Seinfeld, J. H.: Reactive  
387 intermediates revealed in secondary organic aerosol formation from isoprene,  
388 *Proc. Natl. Acad. Sci. U.S.A.*, *107*, 6640-6645, 10.1073/pnas.0911114107, 2010.

389 Surratt, J. D., Gómez-González, Y., Chan, A. W. H., Vermeylen, R., Shahgholi, M.,  
390 Kleindienst, T. E., Edney, E. O., Offenberg, J. H., Lewandowski, M., Jaoui, M.,  
391 Maenhaut, W., Claeys, M., Flagan, R. C., and Seinfeld, J. H.: Organosulfate  
392 Formation in Biogenic Secondary Organic Aerosol, *J. Phys. Chem. A.*, 112,  
393 8345-8378, 10.1021/jp802310p, 2008.

394 Tao, S., Lu, X., Levac, N., Bateman, A. P., Nguyen, T. B., Bones, D. L., Nizkorodov, S.  
395 A., Laskin, J., Laskin, A., and Yang, X.: Molecular characterization of  
396 organosulfates in organic aerosols from Shanghai and Los Angeles urban areas  
397 by nanospray-desorption electrospray ionization high-resolution mass  
398 spectrometry, *Environ. Sci. Technol.*, 48, 10993-11001, 10.1021/es5024674,  
399 2014.

400 Trostl, J., Chuang, W. K., Gordon, H., Heinritzi, M., Yan, C., Molteni, U., Ahlm, L.,  
401 Frege, C., Bianchi, F., Wagner, R., Simon, M., Lehtipalo, K., Williamson, C.,  
402 Craven, J. S., Duplissy, J., Adamov, A., Almeida, J., Bernhammer, A. K.,  
403 Breitenlechner, M., Brilke, S., Dias, A., Ehrhart, S., Flagan, R. C., Franchin, A.,  
404 Fuchs, C., Guida, R., Gysel, M., Hansel, A., Hoyle, C. R., Jokinen, T., Junninen,  
405 H., Kangasluoma, J., Keskinen, H., Kim, J., Krapf, M., Kurten, A., Laaksonen,  
406 A., Lawler, M., Leiminger, M., Mathot, S., Mohler, O., Nieminen, T., Onnela,  
407 A., Petaja, T., Piel, F. M., Miettinen, P., Rissanen, M. P., Rondo, L., Sarnela, N.,  
408 Schobesberger, S., Sengupta, K., Sipila, M., Smith, J. N., Steiner, G., Tome, A.,  
409 Virtanen, A., Wagner, A. C., Weingartner, E., Wimmer, D., Winkler, P. M., Ye,  
410 P., Carslaw, K. S., Curtius, J., Dommen, J., Kirkby, J., Kulmala, M., Riipinen,

411 I., Worsnop, D. R., Donahue, N. M., and Baltensperger, U.: The role of low-  
412 volatility organic compounds in initial particle growth in the atmosphere, *Nature*,  
413 533, 527-531, 10.1038/nature18271, 2016.

414 Wang, Y., Ren, J., Huang, X. H. H., Tong, R., and Yu, J. Z.: Synthesis of Four  
415 Monoterpene-Derived Organosulfates and Their Quantification in Atmospheric  
416 Aerosol Samples, *Environ. Sci. Technol.*, 51, 6791-6801,  
417 10.1021/acs.est.7b01179, 2017.

418 Wang, Y., Ma, Y., Kuang, B., Lin, P., Liang, Y., Huang, C., and Yu, J. Z.: Abundance of  
419 organosulfates derived from biogenic volatile organic compounds: Seasonal and  
420 spatial contrasts at four sites in China, *Sci. Total. Environ.*, 806, 151275,  
421 10.1016/j.scitotenv.2021.151275, 2022.

422 Wang, Y., Ma, Y., Li, X., Kuang, B. Y., Huang, C., Tong, R., and Yu, J. Z.: Monoterpene  
423 and Sesquiterpene alpha-Hydroxy Organosulfates: Synthesis, MS/MS  
424 Characteristics, and Ambient Presence, *Environ. Sci. Technol.*, 53, 12278-  
425 12290, 10.1021/acs.est.9b04703, 2019.

426 Wang, Y., Zhao, Y., Wang, Y., Yu, J. Z., Shao, J., Liu, P., Zhu, W., Cheng, Z., Li, Z., Yan,  
427 N., and Xiao, H.: Organosulfates in atmospheric aerosols in Shanghai, China:  
428 seasonal and interannual variability, origin, and formation mechanisms, *Atmos.*  
429 *Chem. Phys.*, 21, 2959-2980, 10.5194/acp-21-2959-2021, 2021a.

430 Wang, Y., Hu, M., Wang, Y.-C., Li, X., Fang, X., Tang, R., Lu, S., Wu, Y., Guo, S., Wu,  
431 Z., Hallquist, M., and Yu, J. Z.: Comparative Study of Particulate  
432 Organosulfates in Contrasting Atmospheric Environments: Field Evidence for

433 the Significant Influence of Anthropogenic Sulfate and NO<sub>x</sub>, *Environ. Sci.*  
434 *Technol.Lett.*, 7, 787-794, 10.1021/acs.estlett.0c00550, 2020.

435 Wang, Y., Hu, M., Guo, S., Wang, Y., Zheng, J., Yang, Y., Zhu, W., Tang, R., Li, X., Liu,  
436 Y., Le Breton, M., Du, Z., Shang, D., Wu, Y., Wu, Z., Song, Y., Lou, S., Hallquist,  
437 M., and Yu, J.: The secondary formation of organosulfates under interactions  
438 between biogenic emissions and anthropogenic pollutants in summer in Beijing,  
439 *Atmos. Chem. Phys.*, 18, 10693-10713, 10.5194/acp-18-10693-2018, 2018.

440 Wang, Z., Ehn, M., Rissanen, M. P., Garmash, O., Quéléver, L., Xing, L., Monge-  
441 Palacios, M., Rantala, P., Donahue, N. M., Berndt, T., and Sarathy, S. M.:  
442 Efficient alkane oxidation under combustion engine and atmospheric conditions,  
443 *Commun. Chem.*, 4, 10.1038/s42004-020-00445-3, 2021b.

444 Xie, Q., Su, S., Chen, J., Dai, Y., Yue, S., Su, H., Tong, H., Zhao, W., Ren, L., Xu, Y.,  
445 Cao, D., Li, Y., Sun, Y., Wang, Z., Liu, C.-Q., Kawamura, K., Jiang, G., Cheng,  
446 Y., and Fu, P.: Increase of nitrooxy organosulfates in firework-related urban  
447 aerosols during Chinese New Year's Eve, *Atmos. Chem. Phys.*, 21, 11453-11465,  
448 10.5194/acp-21-11453-2021, 2021.

449 Xie, Q., Li, Y., Yue, S., Su, S., Cao, D., Xu, Y., Chen, J., Tong, H., Su, H., Cheng, Y.,  
450 Zhao, W., Hu, W., Wang, Z., Yang, T., Pan, X., Sun, Y., Wang, Z., Liu, C. Q.,  
451 Kawamura, K., Jiang, G., Shiraiwa, M., and Fu, P.: Increase of High Molecular  
452 Weight Organosulfate With Intensifying Urban Air Pollution in the Megacity  
453 Beijing, *J. Geophys. Res.: Atmos.* , 125, 10.1029/2019jd032200, 2020.

454 Xu, Z. N., Nie, W., Liu, Y. L., Sun, P., Huang, D. D., Yan, C., Krechmer, J., Ye, P. L.,

455 Xu, Z., Qi, X. M., Zhu, C. J., Li, Y. Y., Wang, T. Y., Wang, L., Huang, X., Tang,  
456 R. Z., Guo, S., Xiu, G. L., Fu, Q. Y., Worsnop, D., Chi, X. G., and Ding, A. J.:  
457 Multifunctional Products of Isoprene Oxidation in Polluted Atmosphere and  
458 Their Contribution to SOA, *Geophys. Res. Lett.*, 48, 10.1029/2020gl089276,  
459 2021.

460 Yan, C., Nie, W., Äijälä, M., Rissanen, M. P., Canagaratna, M. R., Massoli, P., Junninen,  
461 H., Jokinen, T., Sarnela, N., Häme, S. A. K., Schobesberger, S., Canonaco, F.,  
462 Yao, L., Prévôt, A. S. H., Petäjä, T., Kulmala, M., Sipilä, M., Worsnop, D. R.,  
463 and Ehn, M.: Source characterization of highly oxidized multifunctional  
464 compounds in a boreal forest environment using positive matrix factorization,  
465 *Atmos. Chem. Phys.*, 16, 12715-12731, 10.5194/acp-16-12715-2016, 2016.

466 Yassine, M. M., Dabek-Zlotorzynska, E., Harir, M., and Schmitt-Kopplin, P.:  
467 Identification of weak and strong organic acids in atmospheric aerosols by  
468 capillary electrophoresis/mass spectrometry and ultra-high-resolution Fourier  
469 transform ion cyclotron resonance mass spectrometry, *Anal. Chem.*, 84, 6586-  
470 6594, 10.1021/ac300798g, 2012.

471 Yassine, M. M., Harir, M., Dabek-Zlotorzynska, E., and Schmitt-Kopplin, P.: Structural  
472 characterization of organic aerosol using Fourier transform ion cyclotron  
473 resonance mass spectrometry: aromaticity equivalent approach, *Rapid.  
474 Commun. Mass. Spectrom.*, 28, 2445-2454, 10.1002/rcm.7038, 2014.

475 Ye, Y., Zhan, H., Yu, X., Li, J., Wang, X., and Xie, Z.: Detection of organosulfates and  
476 nitrooxy-organosulfates in Arctic and Antarctic atmospheric aerosols, using

477 ultra-high resolution FT-ICR mass spectrometry, *Sci. Total. Environ.*, 767,  
478 144339, 10.1016/j.scitotenv.2020.144339, 2021.

479 Yttri, K. E., Simpson, D., Nøjgaard, J. K., Kristensen, K., Genberg, J., Stenström, K.,  
480 Swietlicki, E., Hillamo, R., Aurela, M., Bauer, H., Offenberg, J. H., Jaoui, M.,  
481 Dye, C., Eckhardt, S., Burkhardt, J. F., Stohl, A., and Glasius, M.: Source  
482 apportionment of the summer time carbonaceous aerosol at Nordic rural  
483 background sites, *Atmospheric Chemistry and Physics*, 11, 13339-13357,  
484 10.5194/acp-11-13339-2011, 2011.

485
